# Supplementary material for: Genome-Wide Association Study in Bread Wheat Identifies Genomic Regions Associated with Grain Yield and Quality under Contrasting Water Availability
Source: Int J Mol Sci. 2022 Sep 12;23(18):10575. doi: 10.3390/ijms231810575 (PMC9505613; doi:10.3390/ijms231810575)
Supplement: Supplementary file 1 [file ijms-23-10575-s001.zip › Supplementary file 2 revision.xlsx]

## Sheet: Table S1
Genome-wide association study in bread wheat identifies genomic regions associated with grain yield and quality under contrasting water availability.
Nikolai Govta1, Iris Polda2, Hanan Sela3, Yafit Cohen4, Diane M. Beckles5, Abraham Korol1, Tzion Fahima1, Yehoshua Saranga2 and Tamar Krugman3*
3Tamar Krugman, Institute of Evolution, University of Haifa, Abba Khoushy Ave 199, Haifa, 3498838, Israel. Correspondence: Tamar Krugman tkrugman@evo.haifa.ac.il; ORCID: 0000-0002-0339-8515
Table S1. Passport data of 232 accessions of the wheat diversity panel used for GWAS analysis
Whealbi serial number	Taxonomy	Variety/Genotype	Accession number	Genome	Country of origin	Continent
WWNA012	Triticum aestivum	Dekan	NA	ABD	Germany	Europe
WWNA043	Triticum aestivum	Inspiration	NA	ABD	DE/F/DK	Europe
WWNA048	Triticum aestivum	ALCHEMY	NA	ABD	United Kingdom	Europe
WWNA050	Triticum aestivum	CLAIRE	NA	ABD	United Kingdom	Europe
WWNA053	Triticum aestivum	ROBIGUS	NA	ABD	United Kingdom	Europe
WWNA055	Triticum aestivum	XI-19	NA	ABD	United Kingdom	Europe
WWNA056	Triticum aestivum	WELFORD	NA	ABD	United Kingdom	Europe
WWNA057	Triticum aestivum	CHANCELIER	NA	ABD	France	Europe
WWNA058	Triticum aestivum	AMI	NA	ABD	France	Europe
WWNA059	Triticum aestivum	SHAMROCK	NA	ABD	United Kingdom	Europe
WWNA061	Triticum aestivum	PAUILLAC	NA	ABD	France	Europe
WWNA062	Triticum aestivum	QUEBON	NA	ABD	France	Europe
WWNA074	Triticum aestivum var. aestivum	Norin 16	TRI 7453	ABD	Japan	Asia
WWNA077	Triticum aestivum var. aestivum	NS 732	TRI 9464	ABD	Yugoslavia	Europe
WWNA078	Triticum aestivum var. ferrugineum	NA	TRI 2416	ABD	Albania	Europe
WWNA079	Triticum aestivum var. ferrugineum	Norin 4	TRI 7451	ABD	Japan	Asia
WWNA081	Triticum aestivum var. milturum	Chinesischer Weizen	TRI 1414	ABD	China	Asia
WWNA082	Triticum aestivum var. milturum	Crvena Zvezda	TRI 9455	ABD	Yugoslavia	Europe
WWNA083	Triticum aestivum var. suberythrospermum	Shirasay-Ibaragi 2	TRI 7465	ABD	Japan	Asia
WWNA104	Triticum aestivum var. lutescens	NA	TRI 11693	ABD	Pakistan	Asia
WWNA109	Triticum aestivum var. subhostianuminflatum	NA	TRI 11658	ABD	Pakistan	Asia
WWNA114	Triticum aestivum var. hostianum	Griechischer Weizen	TRI 1764	ABD	Greece	Europe
WWNA125	Triticum aestivum var. lutescens	Campeador	TRI 7560	ABD	Spain	Europe
WWNA127	Triticum aestivum var. aestivum	NA	TRI 1763	ABD	Albania	Europe
WWNA131	Triticum aestivum var. milturum	Villa Glori	TRI 5400	ABD	Italy	Europe
WWNA132	Triticum aestivum var. milturum	Novaro	TRI 7374	ABD	Italy	Europe
WWNA133	Triticum aestivum var. alborubrum	Anna Migliori	TRI 7720	ABD	Italy	Europe
WWNA134	Triticum aestivum var. lutescens	Madif 20	TRI 8476	ABD	Italy	Europe
WWNA135	Triticum aestivum var. ferrugineum	Colorben 4	TRI 9375	ABD	Italy	Europe
WWNA136	Triticum aestivum var. lutescens	Marzotto	TRI 9400	ABD	Italy	Europe
WWNA137	Triticum aestivum var. milturum	San Prospero	TRI 9410	ABD	Italy	Europe
WWNA138	Triticum aestivum var. aestivum	NA	TRI 10852	ABD	Nepal	Asia
WWNA140	Triticum aestivum var. subpseudohostianum	NA	TRI 10886	ABD	Nepal	Asia
WWNA143	Triticum aestivum var. lutescens	Mackoviko vahladka	TRI 0159	ABD	Poland	Europe
WWNA145	Triticum aestivum var. milturum	Zdzislawka	TRI 6830	ABD	Poland	Europe
WWNA146	Triticum aestivum var. suberythrospermum	NA	TRI 3338	ABD	India	Asia
WWNA147	Triticum aestivum var. aestivum	NA	TRI 12409	ABD	India	Asia
WWNA149	Triticum aestivum	Flair	NA	ABD	Germany	Europe
WWNA150	Triticum aestivum	Ritmo	NA	ABD	Germany	Europe
WWNA155	Triticum aestivum	Monty	NA	ABD	United Kingdom ?	Europe
WWNA159	Triticum aestivum	Victo	NA	ABD	NA	NA
WWNA160	Triticum aestivum	JB Asano	NA	ABD	Germany	Europe
WWNA161	Triticum aestivum	Interet	NA	ABD	France	Europe
WWNA163	Triticum aestivum	Frument	NA	ABD	Denmark	Europe
WWNA164	Triticum aestivum	Rosario	NA	ABD	France	Europe
WWNA167	Triticum aestivum	Ephoros	NA	ABD	France	Europe
WWNA168	Triticum aestivum	Mikon	NA	ABD	Germany	Europe
WWNA170	Triticum aestivum	Opata	NA	ABD	NA	NA
WWNA171	Triticum aestivum	M6	NA	ABD	NA	NA
WWNA172	Triticum aestivum	Yuval	NA	ABD	Israel	Asia
WWNA173	Triticum aestivum	Zahir	NA	ABD	Israel	Asia
WWNA174	Triticum aestivum	Bar Nir	NA	ABD	Israel	Asia
WWNA175	Triticum aestivum	Gedera	NA	ABD	Israel	Asia
WWNA176	Triticum aestivum	Ruta	NA	ABD	Israel	Asia
WWNA177	Triticum aestivum	Galil	NA	ABD	Israel	Asia
WWNA183	Triticum aestivum	Turkmen-98	NA	ABD	Turkey	Asia
WWNA184	Triticum aestivum	Özkan	NA	ABD	Turkey	Asia
WWNA185	Triticum aestivum	Balattila	NA	ABD	Turkey	Asia
WWNA188	Triticum aestivum var. ferrugineum	NA	TRI 7843	ABD	Bulgaria	Europe
WWNA189	Triticum aestivum var. aestivum	Nr. 301	TRI 7719	ABD	Bulgaria	Europe
WWNA191	Triticum aestivum	Tosunbey	NA	ABD	Turkey	Asia
WWNA192	Triticum aestivum	Sertak-52	NA	ABD	Turkey	Asia
WWNA194	Triticum aestivum	Cumhuriyet-75	NA	ABD	Turkey	Asia
WWNA196	Triticum aestivum	Akçabuğday	NA	ABD	Turkey	Asia
WWNA207	Triticum aestivum	H996	AUS10963	ABD	Afghanistan	Asia
WWNA208	Triticum aestivum	H995	AUS13636	ABD	Afghanistan	Asia
WWNA209	Triticum aestivum	H1001	AUS14442	ABD	Afghanistan	Asia
WWNA210	Triticum aestivum	NA	VIR16772	ABD	Azerbaijan	Asia
WWNA212	Triticum aestivum	NA	VIR23728	ABD	Turkmenia	Asia
WWNA213	Triticum aestivum	NA	VIR23922	ABD	Russia	Asia
WWNA215	Triticum aestivum	Pashmak	VIR33366	ABD	Pakistan	Asia
WWNA218	Triticum aestivum	NA	41606	ABD	Pakistan	Asia
WWNA219	Triticum aestivum	NA	42255	ABD	Turkey	Asia
WWNA220	Triticum aestivum	NA	42416	ABD	Turkey	Asia
WWNA221	Triticum aestivum	NA	42868	ABD	Turkey	Asia
WWNA222	Triticum aestivum	NA	VIR46301	ABD	Azerbaijan	Asia
WWNA223	Triticum aestivum	NA	122348	ABD	Iran	Asia
WWNA224	Triticum aestivum	NA	122491	ABD	Iran	Asia
WWNA225	Triticum aestivum	NA	122619	ABD	Iran	Asia
WWNA226	Triticum aestivum	NA	126331	ABD	Armenia	Asia
WWNA227	Triticum aestivum hadropyrum (Flaksb.)Tzvel.	NA	TR 183	ABD	Spain	Europe
WWNA228	Triticum aestivum hadropyrum (Flaksb.)Tzvel.	NA	PI 654265	ABD	Tajikistan	Asia
WWNA240	Triticum spelta L. subsp. spelta	NA	TR 177	ABD	Spain	Europe
WWNA241	Triticum sphaerococcum Perciv.	NA	PI 83402	ABD	China	Asia
WWNA276	Triticum aestivum	ALTIGO	29843	ABD	France	Europe
WWNA283	Triticum aestivum	AFRICA MAYO	800	ABD	Kenia	Africa
WWNA284	Triticum aestivum	ANDES 56	912	ABD	Colombia	America
WWNA285	Triticum aestivum	ARAWA	957	ABD	New Zealand	Oceania
WWNA286	Triticum aestivum	Arkas	1005	ABD	Germany	Europe
WWNA288	Triticum aestivum	BT2277-TUN	1643	ABD	Tunesia	Africa
WWNA289	Triticum aestivum	BUCKBUCK'S'	1676	ABD	Mexico	America
WWNA291	Triticum aestivum	CH73052	2025	ABD	Switzerland	Europe
WWNA292	Triticum aestivum	DAERAAD	2411	ABD	South Africa	Africa
WWNA294	Triticum aestivum	EMU'S'	2759	ABD	Mexico	America
WWNA295	Triticum aestivum	GLENLEA-CAN	3358	ABD	Canada	America
WWNA297	Triticum aestivum	K1898-9/L200-6	3991	ABD	Bulgaria	Europe
WWNA299	Triticum aestivum	N46	5088	ABD	Israel	Asia
WWNA300	Triticum aestivum	NYU BAY	5399	ABD	Japan	Asia
WWNA301	Triticum aestivum	Pitic 62	5748	ABD	Mexico	America
WWNA303	Triticum aestivum	Coronation	8073	ABD	Canada	America
WWNA308	Triticum aestivum	Tau-bugda	24089	ABD	Russia	Asia
WWNA309	Triticum aestivum	Yumai 34	32925	ABD	China	Asia
WWNA311	Triticum aestivum	2838-39	347	ABD	Bulgaria	Europe
WWNA315	Triticum aestivum	A4	748	ABD	Afghanistan	Asia
WWNA316	Triticum aestivum	ADMONTER	794	ABD	Austria	Europe
WWNA318	Triticum aestivum	AIFENG NO4	822	ABD	China	Asia
WWNA321	Triticum aestivum	ARCHE	964	ABD	France	Europe
WWNA323	Triticum aestivum	ARTOIS-DESPREZ	1044	ABD	France	Europe
WWNA325	Triticum aestivum	BAHATANE 87	1177	ABD	Algeria	Africa
WWNA326	Triticum aestivum	BAIONETTE I	1182	ABD	Italy	Europe
WWNA331	Triticum aestivum	BERZATACA	1332	ABD	Finland	Europe
WWNA335	Triticum aestivum	Blueboy	1531	ABD	USA	America
WWNA336	Triticum aestivum	BT2281	1647	ABD	Tunesia	Africa
WWNA337	Triticum aestivum	BT2296	1655	ABD	Tunesia	Africa
WWNA338	Triticum aestivum	CANDEAL DE AREVALO	1768	ABD	Spain	Europe
WWNA341	Triticum aestivum	COPPADRA	2330	ABD	Turkey	Asia
WWNA342	Triticum aestivum	CORIN	2337	ABD	United Kingdom	Europe
WWNA343	Triticum aestivum	COTIPORA	2353	ABD	Brazil	America
WWNA344	Triticum aestivum	COURTOT	2358	ABD	France	Europe
WWNA347	Triticum aestivum	DETENICKA CERVENA	2475	ABD	Czechia	Europe
WWNA354	Triticum aestivum	ESTANZUELA DORADO	2810	ABD	Uruguay	America
WWNA356	Triticum aestivum	FLAMURA 85	3050	ABD	Romania	Europe
WWNA357	Triticum aestivum	FLINT	3070	ABD	USA	America
WWNA358	Triticum aestivum	FUKUHOKOMUGI	3176	ABD	Japan	Asia
WWNA359	Triticum aestivum	G66257	3213	ABD	Greece	Europe
WWNA360	Triticum aestivum	G72300	3220	ABD	Greece	Europe
WWNA361	Triticum aestivum	GAMMENYA	3256	ABD	Australia	Oceania
WWNA363	Triticum aestivum	GODOLLOI 15	3366	ABD	Hungary	Europe
WWNA364	Triticum aestivum	Granarolo	3402	ABD	Italy	Europe
WWNA366	Triticum aestivum	GULAR	3442	ABD	Australia	Oceania
WWNA367	Triticum aestivum	H742A	3463	ABD	Israel	Asia
WWNA368	Triticum aestivum	H93-70	3485	ABD	Spain	Europe
WWNA369	Triticum aestivum	HYBRIDE 56 VILMORIN	3696	ABD	France	Europe
WWNA371	Triticum aestivum	IAS 1	3753	ABD	Brazil	America
WWNA375	Triticum aestivum	JUFY II	3970	ABD	Belgium	Europe
WWNA376	Triticum aestivum	KENYA 350	4067	ABD	Kenia	Africa
WWNA377	Triticum aestivum	KIRAC 66	4111	ABD	Turkey	Asia
WWNA378	Triticum aestivum	KOLBEN 3	4157	ABD	Sweden	Europe
WWNA379	Triticum aestivum	KRAKA	4187	ABD	Denmark	Europe
WWNA381	Triticum aestivum	LESZYNSKA WCZESNA	4300	ABD	Poland	Europe
WWNA382	Triticum aestivum	LONTOI	4343	ABD	Finland	Europe
WWNA383	Triticum aestivum	M45/66	4477	ABD	Argentina	America
WWNA384	Triticum aestivum	M708//G25/N163	4482	ABD	Israel	Asia
WWNA385	Triticum aestivum	Malgorzatka Udycka	4525	ABD	Poland	Europe
WWNA386	Triticum aestivum	MARS DE SUEDE ROUGE BARBU	4645	ABD	Sweden	Europe
WWNA387	Triticum aestivum	MASTER	4664	ABD	United Kingdom	Europe
WWNA390	Triticum aestivum	MEIRA	4702	ABD	Spain	Europe
WWNA391	Triticum aestivum	MELCHIOR	4706	ABD	The Netherlands	Europe
WWNA393	Triticum aestivum	MISKAAGANI	4874	ABD	Lebanon	Asia
WWNA394	Triticum aestivum	MOCHO DE ESPIGA BRANCA	4901	ABD	Portugal	Europe
WWNA396	Triticum aestivum	N67M2	5096	ABD	Israel	Asia
WWNA397	Triticum aestivum	NACHIPUNDO	5108	ABD	Nepal	Asia
WWNA398	Triticum aestivum	NONG DA NO141	5219	ABD	China	Asia
WWNA399	Triticum aestivum	NZ(81)P43	5401	ABD	New Zealand	Oceania
WWNA400	Triticum aestivum	ODESSA EXP.STA.17413	5415	ABD	Syria	Asia
WWNA401	Triticum aestivum	ODESSA EXPSTA20722	5421	ABD	Portugal	Europe
WWNA402	Triticum aestivum	ODESSA EXPSTA21821	5425	ABD	Portugal	Europe
WWNA403	Triticum aestivum	ODESSKAIA 16	5438	ABD	Ukraine	Europe
WWNA405	Triticum aestivum	OPAL	5486	ABD	Germany	Europe
WWNA406	Triticum aestivum	Orlandi	5501	ABD	Italy	Europe
WWNA408	Triticum aestivum	P. DE BROLLON	5552	ABD	Spain	Europe
WWNA410	Triticum aestivum	PATO	5636	ABD	Argentina	America
WWNA411	Triticum aestivum	PRECOCE	5816	ABD	Portugal	Europe
WWNA412	Triticum aestivum	PROMESSA	5897	ABD	The Netherlands	Europe
WWNA413	Triticum aestivum	REDMAN	6047	ABD	Canada	America
WWNA414	Triticum aestivum	RITAK	6198	ABD	Nepal	Asia
WWNA416	Triticum aestivum	S975-A4-A1	6396	ABD	Zimbabwe	Africa
WWNA417	Triticum aestivum	SEU SEUN 27	6529	ABD	Korea	Asia
WWNA419	Triticum aestivum	Strubes Dickkopf	6740	ABD	Germany	Europe
WWNA420	Triticum aestivum	TAFERSTAT	6843	ABD	Algeria	Africa
WWNA421	Triticum aestivum	TAHTI	6846	ABD	Finland	Europe
WWNA422	Triticum aestivum	TREMESINO MEIRA	7040	ABD	Spain	Europe
WWNA423	Triticum aestivum	TRIGO DE MONTE	7048	ABD	Spain	Europe
WWNA427	Triticum aestivum	RONGOTEA	7848	ABD	New Zealand	Oceania
WWNA428	Triticum aestivum	KITCHENER	8079	ABD	Canada	America
WWNA430	Triticum aestivum	WS-13 CARDENO 34/45	8170	ABD	Spain	Europe
WWNA431	Triticum aestivum	NEELKANT	8194	ABD	Syria	Asia
WWNA432	Triticum aestivum	SANUNU	8197	ABD	Syria	Asia
WWNA433	Triticum aestivum	HOUMANA	8233	ABD	Niger	Africa
WWNA434	Triticum aestivum	CARIBO	8276	ABD	Germany	Europe
WWNA439	Triticum aestivum	Solaris	13210	ABD	Czechia	Europe
WWNA440	Triticum aestivum	FRUH-WEIZEN	13310	ABD	Germany	Europe
WWNA444	Triticum aestivum	PAMUKALE	13799	ABD	Turkey	Asia
WWNA445	Triticum aestivum	ZILVE	13800	ABD	Turkey	Asia
WWNA446	Triticum aestivum	AXONA	13978	ABD	The Netherlands	Europe
WWNA451	Triticum aestivum	HAMAC	20417	ABD	The Netherlands	Europe
WWNA452	Triticum aestivum	Landrace	23891	ABD	Armenia	Asia
WWNA454	Triticum aestivum	Landrace	23902	ABD	Turkey	Asia
WWNA455	Triticum aestivum	Landrace	23909	ABD	Morocco	Africa
WWNA457	Triticum aestivum	Punjab Tipe 24	23933	ABD	India	Asia
WWNA458	Triticum aestivum	Punjab Tipe 15	23937	ABD	India	Asia
WWNA459	Triticum aestivum	Sarrubra	23950	ABD	Russia	Asia
WWNA460	Triticum aestivum	Landrace	23971	ABD	Tajikistan	Asia
WWNA461	Triticum aestivum	Landrace	23974	ABD	Tajikistan	Asia
WWNA462	Triticum aestivum	Landrace	23977	ABD	Georgia	Europe
WWNA463	Triticum aestivum	Soor Ghanum	23981	ABD	Pakistan	Asia
WWNA464	Triticum aestivum	Landrace	23995	ABD	Russia	Asia
WWNA465	Triticum aestivum	Dalnevostochnaya 10	24019	ABD	Russia	Asia
WWNA467	Triticum aestivum	Landrace	24056	ABD	Turkey	Asia
WWNA468	Triticum aestivum	Croisement 268	24066	ABD	Switzerland	Europe
WWNA469	Triticum aestivum	Spin121var12536	24075	ABD	Pakistan	Asia
WWNA470	Triticum aestivum	Albidum 12	24108	ABD	Russia	Asia
WWNA471	Triticum aestivum	Palestinskaya	24180	ABD	Israel	Asia
WWNA472	Triticum aestivum	Landrace	24184	ABD	Israel	Asia
WWNA473	Triticum aestivum	Landrace	24185	ABD	Turkmenia	Asia
WWNA475	Triticum aestivum	Ardito	24209	ABD	Italy	Europe
WWNA476	Triticum aestivum	CHINESE_SPRING	2135	ABD	China	Asia
WWNA478	Triticum aestivum	CHANATE	2072	ABD	Mexico	America
WWNA479	Triticum aestivum	CHIRKUNG	2141	ABD	Nepal	Asia
WWNA480	Triticum aestivum	CHYAMTANG	2171	ABD	Nepal	Asia
WWNA481	Triticum aestivum	FRONTHATCH	3170	ABD	USA	America
WWNA482	Triticum aestivum	GHURKA	3306	ABD	Australia	Oceania
WWNA483	Triticum aestivum	KULUNG	4207	ABD	Nepal	Asia
WWNA484	Triticum aestivum	Mexique 58	4776	ABD	Mexico	America
WWNA487	Triticum aestivum	Punjab Tipe 18	23934	ABD	India	Asia
WWNA488	Triticum aestivum	Landrace	23944	ABD	China	Asia
WWNA489	Triticum aestivum	Landrace	23945	ABD	China	Asia
WWNA490	Triticum aestivum	Landrace	23970	ABD	Tajikistan	Asia
WWNA495	Triticum aestivum	Dolatkhani (white)	WC079	ABD	India	Asia
WWNA496	Triticum aestivum	Gahu (Nepali) or Kyo (Sikkimese)	WC081	ABD	India	Asia
WWNA498	Triticum aestivum	Deve	WC281	ABD	Greece	Europe
WWNA501	Triticum aestivum	Soor Ghanum	WC433	ABD	India	Asia
WWNA502	Triticum aestivum	NA	WC440	ABD	China	Asia
WWNA503	Triticum aestivum	NA	WC474	ABD	Afghanistan	Asia
WWNA504	Triticum aestivum	Surka Oscista	WC483	ABD	Poland	Europe
WWNA505	Triticum aestivum	NA	WC562	ABD	Greece	Europe
WWNA506	Triticum aestivum	NA	WC566	ABD	Greece	Europe
WWNA508	Triticum aestivum	Gahu (Nepali) or Kyo (Sikkimese)	WC732	ABD	India	Asia
WWNA509	Triticum aestivum	NA	WC740	ABD	USSR	Asia
WWNA510	Triticum aestivum	NA	WC742	ABD	Algeria	Africa
WWNA511	Triticum aestivum	Abi	WC789	ABD	USSR	Asia
WWNA512	Triticum aestivum	NA	WC816	ABD	Italy	Europe

## Sheet: Table S2
Table S2. Analysis of variance (ANOVA) of phenotypic traits measured in 232 wheat accessions grown in well-watered and water-limited conditions
Traits	SS_effect	df_effect	MS_effect	SS_error	df_error	MS_error	F	p
GY, g/m2	3.47573e+06	1	3.47573e+06	1.49044e+07	462	32260.6	107.739	7.91104e-23
GPC, %	709.157	1	709.157	705.785	398	1.77333	399.902	7.91104e-23
SW, g	35.2607	1	35.2607	189.668	462	0.410537	85.8893	7.26296e-19
GWpS, g	22.1419	1	22.1419	106.156	462	0.229775	96.3633	8.7299e-21
GNpS	3431.33	1	3431.33	47735.2	462	103.323	33.2098	1.51343e-08
NSpP	52858.3	1	52858.3	2.54508e+06	462	5508.82	9.59521	0.00206969
TGW, g	3033.71	1	3033.71	20226.7	462	43.7808	69.2931	9.67762e-16
GFE	0.0492422	1	0.0492422	1.03614	462	0.00224272	21.9565	3.67447e-06
LA, cm2	1577.33	1	1577.33	21093.1	462	45.656	34.5481	7.97372e-09
OP, MPa	27.5849	1	27.5849	25.089	462	0.48	1.9445	0.051623
LL, cm	629.376	1	629.376	7129.78	462	14.2027	0.3137	0.059152
LW, cm	0.312	1	0.312	24.499	462	0.43	0.63933	0.054761
SLW, mg/cm2	17.121	1	17.121	164.139	462	0.355279	48.1903	1.31634e-11
PH, cm	15876.1	1	15876.1	233350	462	505.087	31.4324	3.558e-08
PedL, cm	4317.03	1	4317.03	30907	462	66.8984	64.5312	7.98141e-15
SL, cm	106.618	1	106.618	1227.03	462	2.65592	40.1435	5.60885e-10
DH, day	535.136	1	535.136	54111.1	462	117.124	4.56898	0.0330802
SS - Value sum-of-squares
df - Degrees of freedom
MS - Mean squares
F - test Fishers
p - p-value

## Sheet: Table S3
Table S3. The average value of phenotypic traits measured in 232 wheat accessions grown in well-watered and water-limited conditions by geographic origin (Europe, Asia, the Mediterranean, Africa, America, and Oceania)
Traits/ Continent	GY		SW		GPC		TGW		PH		DH
	Well-watered (W)
	Means	Std.Dev.	Means	Std.Dev.	Means	Std.Dev.	Means	Std.Dev.	Means	Std.Dev.	Means	Std.Dev.
Europe	624.864	179.082	2.6807	0.513674	13.721	5.68276	41.8181	6.64096	109.635	26.2578	114.63	8.24373
Asia	588.925	175.571	2.55536	0.574307	12.7804	6.15049	43.6439	8.29458	122.176	18.4955	106.87	9.42393
Mediterranean	761.697	195.288	3.22757	0.996172	13.4757	4.99218	46.7035	6.76192	109.64	25.0818	101.946	9.93103
Africa	681.175	171.777	2.73167	0.482566	13.1833	6.25966	44.8217	5.48716	113.077	17.7511	98.1333	9.62604
America	745.961	246.365	3.01667	1.06145	15.15	1.34962	45.3183	6.96944	111.473	18.7025	102.9	9.0049
Oceania	878.333	98.5115	3.14833	0.336239	12.7667	6.39051	46.9683	1.82234	100.748	12.4491	101.833	6.66923
All Group	656.086	200.399	2.78228	0.70857	13.3935	5.61778	43.6706	7.17666	112.523	23.7067	108.505	10.5277
	Drought (D)
Europe	435.565	111.079	2.1365	0.415572	11.287	4.71492	37.9028	5.73305	96.6245	23.673	113.232	10.0878
Asia	456.609	149.021	2.04228	0.473211	10.6842	5.05279	38.0151	6.82482	109.386	16.0587	103.633	8.21908
Mediterranean	576.364	181.91	2.54806	0.742743	11.3861	4.35156	39.6842	5.75952	100.584	21.5076	100.033	8.97944
Africa	599.183	164.087	2.30583	0.448056	11.0667	5.43195	40.28	5.6356	99.4033	14.5532	94.7083	8.05215
America	532.617	162.745	2.56	0.864666	12.4667	0.943086	40.2294	5.656	103.018	18.8918	99.8944	9.25079
Oceania	594.6	191.787	2.39167	0.283014	10.2667	5.06228	39.2567	5.90099	94.4983	9.8299	100.667	6.7429
All Group	482.987	156.081	2.23095	0.564802	11.1073	4.68117	38.5566	6.00476	100.824	21.1699	106.357	11.1092

## Sheet: Table S4
Table S4. List of 40 accessions regarded as drought tolerant (high yield in D), tolerant and stable (high yield in D and W; highlighted with bold letters), and resilient (high yield in W)
Taxa	Treatment	Factor Score	Continent	Origin	Latitude(fromEcuator)_N	Longitude(fromLondon)_E
WWNA079	D	0.692848	Asia	Japan	37	139
WWNA172	D	0.863	Mediterranean	Israel	32	35
WWNA173	D	0.917	Mediterranean	Israel	32	35
WWNA174	D	0.84261	Mediterranean	Israel	32	35
WWNA175	D	0.888128	Mediterranean	Israel	32	35
WWNA176	D	0.781813	Mediterranean	Israel	32	35
WWNA177	D	0.812761	Mediterranean	Israel	32	35
WWNA184	D	0.702	Mediterranean	Turkey	38	35
WWNA191	D	0.616609	Mediterranean	Turkey	38	35
WWNA192	D	0.732	Mediterranean	Turkey	38	35
WWNA194	D	0.720631	Mediterranean	Turkey	38	35
WWNA288	D	0.701	Africa	Tunesia	34.4915	9.22183
WWNA289	D	0.8116	America	Mexico	22	-101
WWNA309	D	0.703	Asia	China	33	101
WWNA336	D	0.784013	Africa	Tunesia	34.4915	9.22183
WWNA337	D	0.751	Africa	Tunesia	34.4915	9.22183
WWNA358	D	0.754968	Asia	Japan	37	139
WWNA361	D	0.765	Oceania	Australia	47	13
WWNA410	D	0.702	America	Argentina	-32.66	-66.53
WWNA416	D	0.733	Africa	Zimbabwe	-19.2097	30.0727
WWNA420	D	0.821	Africa	Algeria	28	2
WWNA431	D	0.849391	Mediterranean	Syria	35	38
WWNA432	D	0.775	Mediterranean	Syria	35	38
WWNA457	D	0.861	Asia	India	35	74
WWNA172	W	0.7	Mediterranean	Israel	32	35
WWNA174	W	0.861728	Mediterranean	Israel	32	35
WWNA175	W	0.81965	Mediterranean	Israel	32	35
WWNA176	W	0.874309	Mediterranean	Israel	32	35
WWNA177	W	0.712	Mediterranean	Israel	32	35
WWNA185	W	0.585394	Mediterranean	Turkey	38	35
WWNA188	W	0.732	Europe	Bulgaria	42	25
WWNA189	W	0.711	Europe	Bulgaria	42	25
WWNA286	W	0.743	Europe	Germany	51	10
WWNA289	W	0.710017	America	Mexico	22	-101
WWNA291	W	0.701	Europe	Switzerland	46.86	8.52
WWNA294	W	0.852	America	Mexico	22	-101
WWNA295	W	0.773	America	Canada	58	-112
WWNA299	W	0.854	Mediterranean	Israel	32	35
WWNA301	W	0.703	America	Mexico	22	-101
WWNA309	W	0.765	Asia	China	33	101
WWNA358	W	0.786	Asia	Japan	37	139
WWNA364	W	0.765	Europe	Italy	41	14
WWNA399	W	0.816	Oceania	New_Zealand	-40	174
WWNA410	W	0.753	America	Argentina	-32.66	-66.53
WWNA430	W	0.783	Europe	Spain	40	-3
WWNA439	W	0.733	Europe	Czechia	49	15
WWNA478	W	0.701	America	Mexico	22	-101
WWNA482	W	0.775	Oceania	Australia	47	13
WWNA484	W	0.862	America	Mexico	22	-101

## Sheet: Table S5
Table S5. Highly significant MTAs found in the different wheat chromosomes, identified by GWAS of 232 wheat accessions grown in well-watered and water-limited conditions. The mark * shows FDR <10-6
Traits	Treatment	Model	SNP	Chr.	Position	QTL	P.value	maf	FDR	effect
GY	W	FarmCPU	WTa_0006f2	1A	6561598	1A.1	1.50042e-05	0.469828	0.0826048	-24.7142
PedL	W	FarmCPU	WTa_00080b	1A	7289633	1A.2	1.09587e-06	0.340517	0.0130721	1.34949
SW	D	FarmCPU	WTa_000810	1A	7290458	1A.2	5.72813e-06	0.293103	0.051672	-0.0958718
NSpP	D	FarmCPU	WTa_001a74	1A	25544603	1A.3*	3.72292e-07	0.30819	0.00666132	-14.2169
PedL	W	FarmCPU	WTa_005bb5	1A	482966563	1A.4	5.0051e-06	0.288793	0.0447775	1.36614
PH	W	FarmCPU	WTa_005e2b	1A	493919653	1A.5*	1.50475e-09	0.103448	5.38483e-05	-6.50813
GNpS	D	FarmCPU	WTa_006e2e	1A	533759095	1A.6	8.46818e-07	0.193966	0.00911144	2.05069
GNpS	W	FarmCPU	WTa_006f6e	1A	535408158	1A.6	3.7588e-07	0.131466	0.0111777	-3.1847
DH	W	FarmCPU	WTa_007131	1A	539964181	1A.6	1.26061e-06	0.135776	0.0180446	2.21112
PH	D	FarmCPU	WTa_00741e	1A	544376641	1A.7	3.94944e-06	0.407328	0.0471109	3.3165
DH	W	FarmCPU	WTa_098648	1A	562708281	1A.8	4.65414e-06	0.0926724	0.0416376	-2.4312
SW	W	FarmCPU	WTa_0082da	1A	579864365	1A.9*	2.87468e-08	0.426724	0.000419167	0.149844
PH	D	FarmCPU	WTa_0084c0	1A	583363894	1A.10	9.76361e-06	0.0862069	0.0873489	-1.92291
GPC	D	GLM	WTa_0988eb	1A	585628300	1A.10	1.64192e-05	0.11	0.0917327	-0.635444
GPC	D	GLM	WTa_0086e0	1A	585628461	1A.10	1.66621e-05	0.1025	0.0917327	-0.654282
GY	W	FarmCPU	WTa_008782	1A	587359950	1A.11*	2.25204e-09	0.0344828	8.05902e-05	-93.6977
GPC	D	GLM	WTa_008783	1A	587360393	1A.11	1.62904e-05	0.4875	0.0917327	-0.398743
SW	D	FarmCPU	WTa_00bcd0	1B	120050618	1B.1*	4.70002e-07	0.0560345	0.0112128	0.202774
GWpS	D	FarmCPU	WTa_00bcd0	1B	120050618	1B.1*	6.48589e-09	0.0560345	0.000464202	0.186933
GY	D	FarmCPU	WTa_00e438	1B	434186537	1B.2	2.39031e-06	0.0560345	0.027885	62.5335
GPC	D	GLM	WTa_00e9ba	1B	470421960	1B.3*	5.37842e-06	0.255	0.0889099	0.486632
DH	D	FarmCPU	WTa_0110b7	1B	632003888	1B.4	3.24347e-06	0.142241	0.0386898	2.42141
GWpS	D	FarmCPU	WTa_01341d	1D	11853248	1D.1	3.39408e-06	0.375	0.053469	-0.0710047
PedL	W	FarmCPU	WTa_013fe4	1D	46631889	1D.2*	5.99932e-07	0.435345	0.00880078	-1.43298
PH	D	FarmCPU	WTa_013fe4	1D	46631889	1D.2*	6.4434e-07	0.435345	0.011529	-3.58509
PH	W	FarmCPU	WTa_013fe4	1D	46631889	1D.2	2.48795e-06	0.435345	0.019785	-3.16013
PedL	D	FarmCPU	WTa_014dfc	1D	419727871	1D.3*	2.47547e-09	0.0905172	8.85858e-05	2.6542
GY	W	FarmCPU	WTa_01533d	1D	441076635	1D.4	5.14314e-06	0.135776	0.0334636	41.1321
GPC	D	GLM	WTa_016bcc	2A	31071558	2A.1*	4.36811e-06	0.2675	0.0889099	0.478393
GPC	D	GLM	WTa_016bfd	2A	31085080	2A.1	1.06666e-05	0.3025	0.0917327	-0.437997
GPC	D	GLM	WTa_016bee	2A	31081634	2A.1	1.22713e-05	0.29	0.0917327	0.438736
GPC	D	GLM	WTa_016c18	2A	31167305	2A.1*	5.0266e-06	0.27	0.0889099	-0.476172
GY	W	FarmCPU	WTa_01a98f	2A	515294908	2A.2*	2.07088e-09	0.232759	8.05902e-05	-43.6331
GNpS	D	FarmCPU	WTa_01be0b	2A	649562157	2A.3	1.45295e-06	0.176724	0.0129986	-2.08324
DH	W	FarmCPU	WTa_01d74a	2A	729063149	2A.4	3.90687e-06	0.454741	0.0399456	1.62237
GY	D	FarmCPU	WTa_09eaba	2B	2087241	2B.1	5.3435e-06	0.224138	0.0424933	34.5626
GPC	D	GLM	WTa_02013f	2B	4966055	2B.2*	6.2113e-06	0.105	0.0889099	-0.663664
GPC	D	GLM	WTa_0201bd	2B	5529420	2B.3	3.37546e-06	0.1	0.0889099	0.708051
DH	D	FarmCPU	WTa_02278f	2B	78829529	2B.4	5.23851e-06	0.37931	0.0394827	-1.87663
PH	W	FarmCPU	WTa_024fa1	2B	249518161	2B.5*	3.38711e-09	0.0732759	8.08064e-05	8.45805
GPC	D	GLM	WTa_024fa1	2B	249518161	2B.5	1.61175e-05	0.065	0.0917327	0.776998
DH	W	FarmCPU	WTa_0272a4	2B	584112356	2B.6*	5.54778e-07	0.0991379	0.0132353	3.0577
GWpS	W	FarmCPU	WTa_0a070e	2B	640340511	2B.7*	1.24291e-07	0.0818966	0.00296522	0.188428
NSpP	D	FarmCPU	WTa_02822a	2B	657791466	2B.8*	6.05921e-18	0.0517241	4.33664e-13	58.5439
GY	D	FarmCPU	WTa_02b20f	2B	755012322	2B.9	3.8134e-06	0.0646552	0.0341161	-51.4084
NSpP	D	FarmCPU	WTa_02ca54	2B	789867892	2B.10	4.07487e-06	0.275862	0.0364553	-13.51
GY	D	FarmCPU	WTa_030a25	2D	600296312	2D.1*	7.58298e-09	0.206897	0.000542721	-40.039
PedL	D	FarmCPU	WTa_030fec	2D	607934208	2D.1*	1.51654e-08	0.327586	0.000339386	1.63879
PedL	W	FarmCPU	WTa_0334ba	3A	13497271	3A.1*	1.06268e-07	0.327586	0.00253523	-1.40789
GWpS	W	FarmCPU	WTa_034238	3A	41367859	3A.2*	1.12978e-09	0.075431	8.08593e-05	-0.203693
SW	W	FarmCPU	WTa_034238	3A	41367859	3A.2*	3.18661e-08	0.075431	0.000419167	-0.24832
GNpS	D	FarmCPU	WTa_034e48	3A	100958142	3A.3	5.92441e-06	0.243534	0.0424016	1.84432
NSpP	D	FarmCPU	WTa_036372	3A	485000703	3A.4	1.81078e-06	0.109914	0.0185142	21.1748
GWpS	W	FarmCPU	WTa_03bff0	3B	13814746	3B.1	3.05305e-06	0.0905172	0.0348572	-0.154206
GNpS	W	FarmCPU	WTa_03bff0	3B	13814746	3B.1	4.14257e-06	0.0905172	0.0423555	-3.76306
PH	W	FarmCPU	WTa_03c11e	3B	16038060	3B.2*	3.8489e-08	0.0409483	0.000688674	8.59104
GY	D	FarmCPU	WTa_03c4ed	3B	20357681	3B.3*	4.64255e-07	0.314655	0.0083068	-28.6631
NSpP	D	FarmCPU	WTa_03c99d	3B	24923814	3B.4*	1.26645e-07	0.413793	0.00302137	-15.8274
GNpS	D	FarmCPU	WTa_03e790	3B	168267016	3B.5	8.00218e-09	0.200431	0.000286362	2.572
PedL	D	FarmCPU	WTa_042128	3B	621145777	3B.6	4.38663e-06	0.0474138	0.0448508	2.63389
GWpS	D	FarmCPU	WTa_04b8ac	4A	539756106	4A.1	7.44185e-07	0.0948276	0.017754	-0.126951
GWpS	D	FarmCPU	WTa_04e958	4A	721412904	4A.2	3.73538e-06	0.0862069	0.053469	0.115304
PedL	W	FarmCPU	WTa_I00b8b3	4B	4897036	4B.1	1.00865e-05	0.219828	0.0656271	-3.64855
PH	W	FarmCPU	WTa_I00b8b3	4B	4897036	4B.1	1.00865e-05	0.219828	0.0656271	-3.64855
NSpP	D	FarmCPU	WTa_051147	4B	19755397	4B.2*	6.07555e-07	0.295259	0.00724722	-15.2385
SW	D	FarmCPU	WTa_051908	4B	58784128	4B.3*	8.30532e-11	0.0926724	5.9442e-06	-0.264707
GWpS	D	FarmCPU	WTa_051908	4B	58784128	4B.3*	1.25201e-07	0.0926724	0.00448038	-0.137701
GNpS	D	FarmCPU	WTa_051908	4B	58784128	4B.3	1.21179e-09	0.0926724	8.67288e-05	-4.15757
GY	W	FarmCPU	WTa_0523ce	4B	140882310	4B.4	3.35461e-06	0.0797414	0.0240093	56.3485
PH	W	FarmCPU	WTa_0523ce	4B	140882310	4B.4	1.11333e-06	0.0797414	0.00996031	-6.29548
GY	D	FarmCPU	WTa_0525cf	4B	172389408	4B.5*	1.33284e-07	0.163793	0.00465562	41.6796
GY	W	FarmCPU	WTa_054080	4B	560014113	4B.6	2.54631e-06	0.0905172	0.0227802	55.1039
PedL	W	FarmCPU	WTa_056214	4D	16156318	4D.1*	1.97433e-12	0.127155	1.41305e-07	-3.39234
PH	W	FarmCPU	WTa_056214	4D	16156318	4D.1*	3.25993e-13	0.127155	2.33317e-08	-8.14738
PH	D	FarmCPU	WTa_056214	4D	16156318	4D.1*	2.26079e-12	0.127155	1.61807e-07	-8.37101
SW	W	FarmCPU	WTa_056efc	5A	8063176	5A.1*	2.79338e-08	0.116379	0.000419167	0.204196
GNpS	D	FarmCPU	WTa_0593d5	5A	413411110	5A.2	2.87517e-06	0.478448	0.0228643	-1.70027
SW	D	FarmCPU	WTa_059bb4	5A	451727902	5A.3	1.07702e-06	0.314655	0.0192709	-0.120812
PH	W	FarmCPU	WTa_05a6c1	5A	472341821	5A.4	8.90205e-06	0.387931	0.0637129	2.8609
GY	W	FarmCPU	WTa_05c00f	5A	547781084	5A.5*	1.69514e-07	0.12069	0.00303308	51.7389
GNpS	W	FarmCPU	WTa_05c13e	5A	549349791	5A.5	1.71721e-06	0.405172	0.0245805	1.92338
GNpS	W	FarmCPU	WTa_05c21a	5A	552374576	5A.6	1.65515e-08	0.435345	0.00118461	-2.53863
GY	W	FarmCPU	WTa_05d15a	5A	591464435	5A.7	2.89307e-06	0.135776	0.0230066	48.3755
NSpP	D	FarmCPU	WTa_05d264	5A	594136607	5A.8*	1.10872e-07	0.314655	0.00302137	17.3279
GWpS	W	FarmCPU	WTa_05ea93	5A	680618100	5A.9	1.03852e-06	0.103448	0.0148655	0.167857
SW	W	FarmCPU	WTa_05fb63	5B	13491417	5B.1*	6.10186e-07	0.260776	0.0048524	0.151098
GY	W	FarmCPU	WTa_06112d	5B	129251315	5B.2	8.31992e-06	0.0387931	0.0496221	-67.2475
PH	D	FarmCPU	WTa_061eb6	5B	328772681	5B.3*	4.24048e-07	0.12069	0.0101165	5.13662
GNpS	W	FarmCPU	WTa_06247b	5B	392495431	5B.4	4.68527e-07	0.105603	0.0111777	-3.98353
DH	D	FarmCPU	WTa_064c52	5B	538296907	5B.5	1.41577e-05	0.24569	0.0921162	1.38122
PedL	D	FarmCPU	WTa_064c52	5B	538296907	5B.5	1.41577e-05	0.24569	0.0921162	1.38122
SW	D	FarmCPU	WTa_0651f9	5B	550849494	5B.6*	2.93511e-08	0.0625	0.00105034	0.231458
DH	D	FarmCPU	WTa_066e88	5B	644886023	5B.7*	8.71807e-09	0.18319	0.000311981	-2.91053
GNpS	D	FarmCPU	WTa_0670f3	5B	657414328	5B.8	3.15894e-07	0.392241	0.00452177	-1.73755
GWpS	D	FarmCPU	WTa_0b179c	5B	662643501	5B.9	7.42591e-06	0.0991379	0.0885799	0.097445
SW	D	FarmCPU	WTa_0b179c	5B	662643501	5B.9	4.27617e-06	0.0991379	0.0510082	0.110633
PedL	D	FarmCPU	WTa_0675d1	5B	670536374	5B.10	7.65732e-06	0.0797414	0.0685053	-1.99748
GY	W	FarmCPU	WTa_067bd2	5B	683112009	5B.11*	5.67286e-07	0.377155	0.00812025	-36.2984
DH	W	FarmCPU	WTa_067ce9	5B	685322124	5B.11	5.91639e-06	0.18319	0.0470491	-1.89721
GWpS	W	FarmCPU	WTa_068b58	5B	700918802	5B.12	3.40921e-06	0.4375	0.0348572	0.0742839
DH	W	FarmCPU	WTa_068ed8	5B	710959514	5B.13*	8.1634e-07	0.25431	0.0146066	1.85126
DH	W	FarmCPU	WTa_06b29d	6A	683572	6A.1*	3.29983e-07	0.135776	0.0118086	-2.35409
GNpS	D	FarmCPU	WTa_06cb75	6A	22023289	6A.2	8.91144e-07	0.459052	0.00911144	-1.62879
GWpS	W	FarmCPU	WTa_06cf1e	6A	25019163	6A.3*	2.10189e-08	0.357759	0.00075217	-0.101173
SW	W	FarmCPU	WTa_06cf1e	6A	25019163	6A.3*	3.514e-08	0.357759	0.000419167	-0.13016
GWpS	W	FarmCPU	WTa_06dfe3	6A	65684212	6A.4	6.687e-06	0.403017	0.0478596	0.112207
PedL	W	FarmCPU	WTa_06fde6	6A	454651109	6A.5	1.50304e-06	0.381466	0.0153677	-1.38456
SW	D	FarmCPU	WTa_0b4527	6A	553940274	6A.6	5.77575e-06	0.258621	0.051672	-0.125742
DH	W	FarmCPU	WTa_071380	6A	580538115	6A.7*	3.01905e-07	0.0840517	0.0118086	3.81027
SW	W	FarmCPU	WTa_071380	6A	580538115	6A.7*	4.40046e-07	0.0840517	0.00393682	-0.24205
GPC	D	GLM	WTa_073b3a	6B	4856971	6B.1	1.57112e-05	0.055	0.0917327	-0.883793
DH	D	FarmCPU	WTa_075c1e	6B	100355529	6B.2	5.05334e-06	0.398707	0.0394827	1.66318
GNpS	W	FarmCPU	WTa_076386	6B	131656358	6B.3	5.3754e-06	0.133621	0.042747	-0.133565
SW	W	FarmCPU	WTa_076619	6B	136793614	6B.3*	1.48992e-08	0.403017	0.000419167	0.153656
PH	D	FarmCPU	WTa_I01103f	6B	155547540	6B.4*	2.11434e-07	0.0991379	0.00756627	5.71111
PH	W	FarmCPU	WTa_076d70	6B	157911835	6B.4*	6.96426e-07	0.075431	0.00712056	-6.00219
GY	D	FarmCPU	WTa_076e74	6B	159543890	6B.4*	1.95147e-07	0.0452586	0.00465562	64.051
PedL	D	FarmCPU	WTa_07771c	6B	207106691	6B.5	1.11028e-10	0.325431	7.94637e-06	1.85291
SW	W	FarmCPU	WTa_077da5	6B	252094108	6B.6*	3.64088e-07	0.144397	0.00372259	-0.200273
GPC	D	GLM	WTa_078f94	6B	471508328	6B.7*	9.63939e-06	0.0825	0.0917327	0.732899
PedL	D	FarmCPU	WTa_079008	6B	474180265	6B.7*	1.94335e-06	0.407328	0.0250174	-1.35831
GNpS	D	FarmCPU	WTa_07a6c3	6B	615641048	6B.8	2.05458e-07	0.101293	0.0036762	3.70731
GNpS	W	FarmCPU	WTa_07aab8	6B	631133996	6B.9	1.22287e-06	0.394397	0.0218804	-2.02584
GY	W	FarmCPU	WTa_07b954	6B	671455531	6B.10	1.25702e-06	0.0862069	0.0149944	-57.9735
DH	D	FarmCPU	WTa_07bb5b	6B	680730211	6B.11	5.30487e-06	0.275862	0.0394827	1.79012
GY	D	FarmCPU	WTa_07bcda	6B	685965379	6B.11*	6.59046e-07	0.204741	0.00943372	-33.2407
SW	D	FarmCPU	WTa_07c41a	6B	703299574	6B.12	3.61183e-06	0.284483	0.0510082	-0.0975309
SW	W	FarmCPU	WTa_07c53e	6B	704654149	6B.12	2.052e-05	0.282328	0.0979093	26.2943
NSpP	D	FarmCPU	WTa_07cafc	6B	707292393	6B.12*	5.04575e-07	0.114224	0.00722259	-20.3819
DH	D	FarmCPU	WTa_07ce05	6B	710098674	6B.13*	7.72534e-09	0.181034	0.000311981	-2.9412
GY	W	FarmCPU	WTa_07f441	6D	424951300	6D.1	2.02341e-05	0.0732759	0.0979093	47.8181
GWpS	W	FarmCPU	WTa_08111b	7A	6496026	7A.1	5.36502e-06	0.273707	0.042747	0.0921935
PH	D	FarmCPU	WTa_081dd6	7A	19005839	7A.2	3.86588e-06	0.0625	0.0471109	-5.94936
PH	W	FarmCPU	WTa_081e42	7A	19081795	7A.2*	2.57635e-07	0.0818966	0.00368784	5.88546
DH	D	FarmCPU	WTa_0b8e70	7A	22919368	7A.3	1.32018e-06	0.202586	0.0243136	2.03805
SW	W	FarmCPU	WTa_082bd7	7A	39482275	7A.4*	3.23248e-09	0.0646552	0.000231352	0.307258
PedL	D	FarmCPU	WTa_083302	7A	63111598	7A.5	1.04636e-05	0.109914	0.0789929	2.18595
GNpS	W	FarmCPU	WTa_083631	7A	76194642	7A.6	5.77e-06	0.202586	0.0516206	-2.26244
DH	D	FarmCPU	WTa_084254	7A	108952429	7A.7	1.44673e-06	0.0775862	0.0243136	-3.27742
DH	W	FarmCPU	WTa_084aa8	7A	136350710	7A.8	8.168e-06	0.181034	0.0584592	1.95823
PedL	D	FarmCPU	WTa_08625d	7A	287473300	7A.9	1.1037e-05	0.375	0.0789929	-1.2044
GWpS	W	FarmCPU	WTa_088fe3	7A	652692209	7A.10*	5.75909e-07	0.491379	0.0103046	-0.0722131
GY	W	FarmCPU	WTa_0baa8e	7A	701771243	7A.11	2.39657e-06	0.146552	0.0227802	-42.4002
GY	D	FarmCPU	WTa_08b749	7B	8526841	7B.1	2.72729e-06	0.0840517	0.027885	-48.4744
PedL	D	FarmCPU	WTa_0bb95e	7B	526853853	7B.2	2.09728e-06	0.109914	0.0250174	2.17365
GNpS	D	FarmCPU	WTa_09003d	7B	593558260	7B.3	1.68046e-07	0.168103	0.0036762	-2.3721
DH	D	FarmCPU	WTa_0909f5	7B	638074315	7B.4	1.69857e-06	0.0603448	0.0243136	-3.39248
PedL	W	FarmCPU	WTa_093c63	7B	744604206	7B.5*	1.88694e-09	0.107759	6.75252e-05	-2.82859
DH	W	FarmCPU	WTa_094659	7D	2238665	7D.1	3.61485e-06	0.18319	0.0399456	-2.14967
PedL	D	FarmCPU	WTa_0953c0	7D	55072906	7D.2*	1.89678e-08	0.133621	0.000339386	2.20309
GNpS	W	FarmCPU	WTa_095e73	7D	397574732	7D.3	3.43911e-06	0.0560345	0.0410234	-3.9196
PH	W	FarmCPU	WTa_095f10	7D	416235092	7D.4*	3.12959e-07	0.157328	0.00373314	5.50831
GY	W	FarmCPU	WTa_0bda7d	7D	520404662	7D.5*	1.72555e-08	0.0948276	0.000411664	-61.6464
PedL	W	FarmCPU	WTa_09646e	7D	575925006	7D.6*	6.14828e-07	0.0560345	0.00880078	2.80879

## Sheet: Table S6
Table S6. Potential candidate genes for MTAs by IntrePro description and their relation to stress based on a literature search. MTAs found by GWAS analysis of wheat diversity panels grown in well-watered and water-limited conditions.
Traits	SNP	Condition	Chromosome	Position	Gene stable ID	Gene start (bp)	Gene end (bp)	Interpro Description	Key words	Reference
GY	WTa_0525cf	D	4B	172389408	TraesCS4B02G132500	172501019	172502979	NAC domain	water, stress, drought	Ma et al., 2022; Jia et al., 2022; Chávez Montes et al. 2008.
GY	WTa_076e74	D	6B	159543890	TraesCS6B02G156800	159377962	159379638	Leucine-rich repeat-containing N-terminal, plant-type	salt, stress, heat	Park et al., 2014; Xu et al., 2022
GY	WTa_07bcda	D	6B	685965379	TraesCS6B02G412300	685964169	685969494	Zinc finger, NHR/GATA-type	drought	Yin et al., 2017; Huang et al., 2009
GY	WTa_03c4ed	D	3B	20357681	TraesCS3B02G040900	20348050	20358831	Cation efflux protein	stress	Hussain et al., 2022; Huang et al., 2022
GY	WTa_030a25	D	2D	600296312	TraesCS2D02G506400	600294258	600300322	CRAL-TRIO lipid binding domain	heat, stress	Suprunova et al., 2007; Mangrauthia et al., 2017; Wang et al., 2016; Zhang et al., 2009
SW	WTa_0651f9	D	5B	550849494	TraesCS5B02G373000	550844202	550848058	Zinc finger, RING-type	stress, drought	Rojas‐Gutierrez et al., 2022; Gall et al., 2015
SW	WTa_00bcd0	D	1B	120050618	TraesCS1B02G107900	120040365	120044525	Peptidase S1, PA clan	stress, heat	Arenas et al., 2022
GWpS	WTa_04b8ac	D	4A	539756106	TraesCS4A02G230700	539755262	539761303	RWP-RK domain	stress, nitrogen	Kumar et al., 2018
NSpP	WTa_02822a	D	2B	657791466	TraesCS2B02G463800	657790256	657793959	Helix-loop-helix DNA-binding domain superfamily	stress, heat	Zhang, 2018; Carey-Fung et al., 2022
NSpP	WTa_05d264	D	5A	594136607	TraesCS5A02G401400	594136848	594145296	Protein kinase, ATP binding site		Wang et al., 2016
NSpP	WTa_03c99d	D	3B	24923814	TraesCS3B02G049100	24911564	24944677	Protein kinase domain		Wang et al., 2016
NSpP	WTa_051147	D	4B	19755397	TraesCS4B02G026400	19754236	19759464	Zinc finger, CCHC-type superfamily	drought, resistant, stress	Nergui et al., 2022; Lu et al., 2022
PH	WTa_013fe4	D	1D	46631889	TraesCS1D02G065300	46631910	46635411	Glycosyl transferase, family 20	salt stress, drought	Ross et al., 2001; Zheng et al. 2017; Sado et al., 2009; Kumar et al., 2022
PH	WTa_I01103f	D	6B	155547540	TraesCS6B02G151700	155549819	155552822	NB-ARC	cold, stress	Su et al., 2022
PedL	WTa_0953c0	D	7D	55072906	TraesCS7D02G092100	55072046	55075360	GDP-fucose protein O-fucosyltransferase	stress	Reddick-Lau et al., 2016; Halliday et al., 2016
PedL	WTa_079008	D	6B	474180265	TraesCS6B02G263200	474176950	474180168	Alcohol dehydrogenase, zinc-type, conserved site	oxidative stress	Chen et al., 2021; Konovalov et al., 2021
DH	WTa_066e88	D	5B	644886023	TraesCS5B02G471700	644889114	644890701	PsbQ-like domain superfamily		Janiak et al., 2018; Hanhart et al., 2017
DH	WTa_07ce05	D	6B	710098674	TraesCS6B02G451200	710095330	710101651	Phosphatidylinositol-4-phosphate 5-kinase, core	water, stress	Mikami et al., 1998; Ugalde et al., 2016
GPC	WTa_078f94	D	6B	471508328	TraesCS6B02G262000	471675673	471676886	ATP-dependent peptidase activity	stress	Jan et al., 2022
GPC	WTa_02013f	D	2B	4966055	TraesCS2B02G008200	4984078	4990934	zinc ion binding	resistance, stress	Yin et al. 2017, Gao et al., 2022
GPC	WTa_016bcc	D	2A	31071558	TraesCS2A02G070300	31072385	31077509	ADP glucose pyrophosphorylase	heat, stress	Bijalwan et al., 2022, Figueroa et al., 2022
GY	WTa_008782	W	1A	587359950	TraesCS1A02G437600	587359674	587362070	RmlC-like cupin domain superfamily	stress	Karlik, E. 2021; Khan et al., 2021; Giraud et al. 2000; Dunwell, J. M. 1998; Mujahid et al., 2018
GY	WTa_01a98f	W	2A	515294908	TraesCS2A02G299400	515292584	515295492	Protein kinase domain	stress	Wang et al., 2016; Xu et al., 2021
GY	WTa_067bd2	W	5B	683112009	TraesCS5B02G521100	683109213	683139863	IQ motif, EF-hand binding site	stress, heat	Liu et al., 2022; Kaur, A., & Upadhyay, S. K. 2022
SW	WTa_05fb63	W	5B	13491417	TraesCS5B02G014100	13496734	13498307	WAT1-related protein		Fang et al., 2022
SW	WTa_06cf1e	W	6A	25019163	TraesCS6A02G049000	25017986	25022413	Ionotropic glutamate receptor		Bandyopadhyay et al. 2022
SW	WTa_071380	W	6A	580538115	TraesCS6A02G348400	580533267	580537934	Amino acid transporter, transmembrane domain		Le Cong Huyen Bao Phan et al., 2022
SW	WTa_077da5	W	6B	252094108	TraesCS6B02G204100	252094255	252100111	Peptidase S1, PA clan	heat shock	Arenas et al., 2022
GWpS	WTa_06cf1e	W	6A	25019163	TraesCS6A02G049000	25017986	25022413	Plant glutamate receptor, periplasmic ligand-binding domain		Sagwal et al., 2022, Ghosh et al., 2022
GWpS	WTa_0a070e	W	2B	640340511	TraesCS2B02G447400	640334480	640341450	Potassium transporter	stress	Singh et al., 2022, Francini et al., 2022; Wang et al., 2022
GWpS	WTa_00bcd0	W	1B	120050618	TraesCS1B02G108000	120045548	120062075	PDZ domain	stress	Pathak et al., 2021
GWpS	WTa_051908	W	4B	58784128	TraesCS4B02G065900	58781653	58785591	DNA/RNA-binding protein Alba-like	heat shock	Lamelas et al., 2020
PH	WTa_061eb6	W	5B	328772681	TraesCS5B02G180900	328371308	328375058	Ubiquitin-conjugating enzyme, active site	stress	Li et al., 2022; Liu et al., 2021
PH	WTa_024fa1	W	2B	249518161	TraesCS2B02G245600	249517596	249524956	Endoplasmic reticulum vesicle transporter, C-terminal		Brandizzi et al., 2021; Song et al., 2021; Pastor-Cantizano et al., 2020
PedL	WTa_09646e	W	7D	575925006	TraesCS7D02G458100	576055977	576056549	Cullin repeat-like-containing domain superfamily		Li et al., 2022
DH	WTa_0272a4	W	2B	584112356	TraesCS2B02G410600	584112420	584121251	ELMO domain	stress	Wang et al., 2019; Kohorn et al., 2022
DH	WTa_068ed8	W	5B	710959514	TraesCS5B02G566900	710959787	710965476	NB-ARC		Zhang et al., 2011
DH	WTa_06b29d	W	6A	683572	TraesCS6A02G001100	637766	644465	Disulphide isomerase	drought, stress	Rakhra et al., 2021; Fu et al., 2021
DH	WTa_071380	W	6A	580538115	TraesCS6A02G348400	580533267	580537934	Amino acid transporter, transmembrane domain		Fang et al., 2022
GY	WTa_0bda7d	W	7D	520404662	TraesCS7D02G403300	520405786	520408608	Cyclophilin-type peptidyl-prolyl cis-trans isomerase domain	drought	Wang et al., 2022
PedL	WTa_093c63	W	7B	744604206	TraesCS7B02G492500	744504787	744507436	S-phase kinase-associated protein 1-like	salt, stress	Choudhary et al., 2021; Khomdram & Barthakur 2015

## Sheet: Table S7
Table S7. Candidate genes identified within or close MTAs found by GWAS analysis of wheat diversity panels grown in well-watered and water-limited conditions.
Traits	SNP	Chromosome	Position	Gene stable ID	Gene start (bp)	Gene end (bp)	Interpro Description
Water-limited
GY				TraesCS2D02G506300	600161338	600164249	Zinc/iron permease
GY	WTa_030a25	2D	600296312	TraesCS2D02G506400	600294258	600300322	CRAL-TRIO lipid binding domain
GY				TraesCS2D02G506500	600318433	600322117	AP2/ERF domain
GY				TraesCS2D02G506700	600402521	600406416	Biotinyl protein ligase (BPL) and lipoyl protein ligase (LPL), catalytic domain
GY				TraesCS2D02G506900	600433915	600434879	PB1 domain
GY				TraesCS2D02G506200	600131157	600134165	Zinc/iron permease
GY				TraesCS2D02G506800	600406427	600411804	Calcineurin-like phosphoesterase domain, ApaH type
GY				TraesCS4B02G131800	172314683	172320150	Haem oxygenase
GY				TraesCS4B02G131900	172320829	172321588	Phytosulfokine
GY				TraesCS4B02G132000	172377955	172379874	Protein kinase domain
GY				TraesCS4B02G132200	172384674	172387879	Plant organelle RNA recognition domain
GY	WTa_0525cf	4B	172389408	TraesCS4B02G132300	172388855	172392423	Alpha-L-arabinofuranosidase, C-terminal
GY				TraesCS4B02G132400	172397431	172398054	Pectinesterase inhibitor domain
GY				TraesCS4B02G132500	172501019	172502979	NAC domain
GY				TraesCS4B02G132600	172503671	172506677	Ribosomal protein L24
GY				TraesCS4B02G132700	172507960	172511363	RNA recognition motif domain
GY				TraesCS4B02G132800	172520681	172524218	EF-hand domain
GY				TraesCS6B02G156700	159368061	159373561	Domain unknown function DUF295
GY				TraesCS6B02G156800	159377962	159379638	Leucine-rich repeat-containing N-terminal, plant-type
GY	WTa_076e74	6B	159543890	TraesCS6B02G157400	159688239	159700272	Kelch repeat type 1
GY				TraesCS6B02G157500	159702616	159704168	F-box domain
GY				TraesCS6B02G157600	159705644	159706239	DNA-binding pseudobarrel domain superfamily
GY				TraesCS3B02G040700	20305516	20306064	Zinc finger, GRF-type
GY				TraesCS3B02G040800	20319978	20321665	NPR1/NH1-interacting protein
GY	WTa_03c4ed	3B	20357681	TraesCS3B02G040900	20348050	20358831	Cation efflux protein
GY				TraesCS3B02G041000	20378573	20379983	Transferase
GY				TraesCS3B02G041100	20382504	20383873	HotDog domain superfamily
GY				TraesCS3B02G041200	20430217	20430899	NPR1/NH1-interacting protein
GY				TraesCS3B02G041300	20450327	20452513	NB-ARC
GY				TraesCS3B02G041400	20459272	20460080	NB-ARC
GY				TraesCS3B02G041500	20473379	20475673	F-box domain
GY				TraesCS3B02G041600	20538868	20541894	Soluble quinoprotein glucose/sorbosone dehydrogenase
GY	WTa_07bcda	6B	685965379	TraesCS6B02G412300	685964169	685969494	Zinc finger, NHR/GATA-type
GY				TraesCS6B02G412500	686170726	686174467	Leucine-rich repeat domain superfamily
GY				TraesCS6B02G412600	686178708	686182890	Nucleotide-diphospho-sugar transferases
GY				TraesCS6B02G412700	686191925	686193614	Oxoglutarate/iron-dependent dioxygenase
GY				TraesCS6B02G412800	686213545	686215844	Oxoglutarate/iron-dependent dioxygenase
GY				TraesCS1B02G244700	434084045	434089681	AT4G37440-like
GY	WTa_00e438	1B	434186537	TraesCS1B02G244800	434185588	434189783	Glycoside hydrolase family 1
GY				TraesCS1B02G244900	434335324	434336006	Histone H2B
GY				TraesCS1B02G245100	434413531	434416954	Ribosome biogenesis protein Nop16
GY				TraesCS1B02G245200	434422573	434423258	Histone H3/CENP-A
GY				TraesCS1B02G245300	434429183	434429838	Histone-fold
GY				TraesCS1B02G245000	434409017	434411291	Histone-fold
GY				TraesCS7B02G012300	8364004	8367295	Domain unknown function DUF295
GY	WTa_08b749	7B	8526841	TraesCS7B02G012400	8519789	8526697	Heparan sulphate 6-sulfotransferase/Protein-tyrosine sulfotransferase
GY				TraesCS2B02G562400	754782577	754784001	Transcription factor GRAS
GY				TraesCS2B02G562600	754866308	754867537	Exocyst complex component Exo70
GY				TraesCS2B02G562500	754863037	754865182	Protein kinase domain
GY				TraesCS2B02G562700	754920037	754927066	NB-ARC
GY				TraesCS2B02G562800	754927415	754928665	Flavin monooxygenase-like
GY	WTa_02b20f	2B	755012322	TraesCS2B02G563000	754976843	754978230	Peptidase M10, metallopeptidase
GY				TraesCS2B02G563100	755032706	755033267	Protein kinase-like domain superfamily
GY				TraesCS2B02G563200	755036582	755038526	Cytochrome P450
GY				TraesCS2B02G563300	755054555	755056586	Cytochrome P450
GY				TraesCS2B02G563400	755146367	755150833	Protein kinase domain
GY	WTa_09eaba	2B	2087241	TraesCS2B02G003700	2086946	2088978	Cytochrome P450
GY				TraesCS2B02G004000	2109410	2113388	Ribokinase-like
GY				TraesCS2B02G004100	2116046	2116633	Cereal seed allergen/trypsin and alpha-amylase inhibitor, conserved site
GY				TraesCS2B02G004200	2235456	2238338	Cytochrome P450
GY				TraesCS2B02G004300	2335787	2336388	Knottin, scorpion toxin-like superfamily
SW				TraesCS4B02G065700	58597721	58599609	RNA recognition motif domain
SW				TraesCS4B02G065800	58744509	58755136	tRNA ligase, phosphodiesterase
SW	WTa_051908	4B	58784128	TraesCS4B02G065900	58781653	58785591	Alba-like domain superfamily
SW				TraesCS4B02G066000	58925787	58928009	Glycoside hydrolase, family 32
SW				TraesCS4B02G066100	58955455	58957402	Protein of unknown function DUF247, plant
SW				TraesCS4B02G066200	58978798	58979241	Glycosyl hydrolase family 32, C-terminal
SW				TraesCS5B02G372800	550727559	550733169	Rhomboid-like superfamily
SW				TraesCS5B02G372900	550745492	550750167	Glu-tRNAGln amidotransferase C subunit
SW				TraesCS5B02G373000	550844202	550848058	Zinc finger, RING-type
SW	WTa_0651f9	5B	550849494	TraesCS5B02G373100	550848959	550852447	GTD-binding domain
SW				TraesCS5B02G373200	550927350	550930487	Elongation factor EFG, domain V-like
SW				TraesCS5B02G373300	551049086	551055562	Protein DYAD/AMEIOTIC 1
SW				TraesCS1B02G107800	119883160	119887378	P-loop containing nucleoside triphosphate hydrolase
SW	WTa_00bcd0	1B	120050618	TraesCS1B02G107900	120040365	120044525	Peptidase S1, PA clan
SW				TraesCS5A02G235700	451478415	451481331	Peptidase S26A, signal peptidase I
SW				TraesCS5A02G235800	451483396	451488942	Nucleoporin p58/p45
SW	WTa_059bb4	5A	451727902	TraesCS5A02G236000	451720676	451730626	Peptidase S9, prolyl oligopeptidase, catalytic domain
SW				TraesCS5A02G236100	451731021	451736139	Aminotransferase, class I/classII
SW				TraesCS5A02G236200	451740245	451742996	MORN motif
SW				TraesCS5A02G236300	451880134	451883804	Peptidase S54, rhomboid domain
SW				TraesCS6B02G434700	703152543	703157549	OTU domain
SW				TraesCS6B02G434800	703165608	703170593	Protein kinase domain
SW				TraesCS6B02G434900	703283589	703288511	ABC transporter-like
SW				TraesCS6B02G435000	703288889	703290737	Zinc finger, DNL-type
SW	WTa_07c41a	6B	703299574	TraesCS6B02G435100	703298275	703299944	PGG domain
SW				TraesCS6B02G435200	703306035	703308435	PGG domain
SW				TraesCS6B02G435300	703313202	703316815	PGG domain
SW				TraesCS6B02G435400	703347710	703349863	PGG domain
SW				TraesCS6B02G435500	703388743	703389471	Pectinesterase inhibitor domain
SW				TraesCS6B02G435700	703412803	703422280	PGG domain
SW				TraesCS6B02G435800	703434885	703439416	Protein of unknown function DUF594
SW				TraesCS6B02G435900	703447901	703448899	Protein of unknown function DUF594
SW				TraesCS6B02G436000	703453554	703454273	PGG domain
SW				TraesCS6B02G436100	703463862	703466298	PGG domain
SW				TraesCS5B02G494500	662453721	662456472	Transcription factor GRAS
SW				TraesCS5B02G494600	662456581	662459290	NAD(P)-binding domain superfamily
SW				TraesCS5B02G494700	662459553	662462513	Leucine-rich repeat
SW				TraesCS5B02G494800	662594115	662596754	Leucine-rich repeat
SW	WTa_0b179c	5B	662643501	TraesCS5B02G494900	662644423	662646617	Ribosomal RNA methyltransferase FtsJ domain
SW				TraesCS5B02G495000	662851150	662856702	O-acyltransferase, WSD1, N-terminal
SW				TraesCS5B02G495000	662851150	662856702	O-acyltransferase WSD1, C-terminal
SW				TraesCS1A02G012200	7100687	7101431	Adaptor protein Cbl, N-terminal domain superfamily
SW				TraesCS1A02G012500	7178200	7184960	Citron homology (CNH) domain
SW				TraesCS1A02G012600	7185497	7186507	Leucine-rich repeat
SW				TraesCS1A02G012700	7228719	7229943	Enoyl-CoA hydratase/isomerase
SW				TraesCS1A02G012800	7274801	7275803	ClpP/crotonase-like domain superfamily
SW				TraesCS1A02G012900	7276861	7279534	Enoyl-CoA hydratase/isomerase
SW	WTa_000810	1A	7290458	TraesCS1A02G013000	7281836	7294634	NB-ARC
SW				TraesCS1A02G013100	7311700	7312269	Transcription factor, MADS-box
SW				TraesCS1A02G013200	7315101	7325769	Ankyrin repeat
SW				TraesCS6A02G317401	553741586	553742095	Bifunctional inhibitor/plant lipid transfer protein/seed storage helical domain
SW				TraesCS6A02G317403	553745060	553745509	Plant lipid transfer protein/Par allergen
SW				TraesCS6A02G317400	553758191	553759150	Protein of unknown function DUF1677, Oryza sativa
SW				TraesCS6A02G317500	553765687	553766887	UDP-glucuronosyl/UDP-glucosyltransferase
SW				TraesCS6A02G317600	553911639	553913442	UDP-glucuronosyl/UDP-glucosyltransferase
SW	WTa_0b4527	6A	553940274	TraesCS6A02G317700	553925933	553927835	UDP-glucuronosyl/UDP-glucosyltransferase
GWpS				TraesCS1B02G107800	119883160	119887378	P-loop containing nucleoside triphosphate hydrolase
GWpS				TraesCS1B02G107900	120040365	120044525	Peptidase S1, PA clan
GWpS	WTa_00bcd0	1B	120050618	TraesCS1B02G108000	120045548	120062075	PDZ domain
GWpS				TraesCS4B02G065700	58597721	58599609	RNA recognition motif domain
GWpS				TraesCS4B02G065800	58744509	58755136	tRNA ligase, phosphodiesterase
GWpS	WTa_051908	4B	58784128	TraesCS4B02G065900	58781653	58785591	DNA/RNA-binding protein Alba-like
GWpS				TraesCS4B02G066000	58925787	58928009	Glycoside hydrolase, family 32
GWpS				TraesCS4B02G066100	58955455	58957402	Protein of unknown function DUF247, plant
GWpS				TraesCS4B02G066200	58978798	58979241	Concanavalin A-like lectin/glucanase domain superfamily
GWpS				TraesCS4A02G230500	539583920	539585498	Calcineurin-like phosphoesterase domain, ApaH type
GWpS				TraesCS4A02G230600	539751284	539754724	Leucine-rich repeat
GWpS	WTa_04b8ac	4A	539756106	TraesCS4A02G230700	539755262	539761303	RWP-RK domain
GWpS				TraesCS1D02G029500	11616634	11624592	Calcium-dependent channel, 7TM region, putative phosphate
GWpS				TraesCS1D02G029700	11638806	11640545	Transferase
GWpS				TraesCS1D02G029900	11654673	11662254	NB-ARC
GWpS				TraesCS1D02G030000	11664577	11668738	Adaptor protein Cbl, N-terminal domain superfamily
GWpS				TraesCS1D02G030041	11679306	11683061	NB-ARC
GWpS				TraesCS1D02G030300	11780392	11783116	Zinc finger, RING-type
GWpS	WTa_01341d	1D	11853248	TraesCS1D02G030400	11849875	11854704	Multi antimicrobial extrusion protein
GWpS				TraesCS1D02G030500	11878831	11879866	Heat shock protein DnaJ, cysteine-rich domain superfamily
GWpS				TraesCS1D02G030600	11966309	11972829	NAD(P)-binding domain
GWpS				TraesCS1D02G030700	11973553	11977690	Transcription factor GRAS
GWpS				TraesCS1D02G030800	12029858	12031963	Transcription factor GRAS
GWpS				TraesCS1D02G030900	12054846	12056987	Transcription factor GRAS
GWpS	WTa_04e958	4A	721412904	TraesCS4A02G456300	721380650	721386377	Cellulose synthase
GWpS				TraesCS5B02G494500	662453721	662456472	Transcription factor GRAS
GWpS				TraesCS5B02G494600	662456581	662459290	Sanguinarine reductase SARED1-like
GWpS				TraesCS5B02G494700	662459553	662462513	Leucine-rich repeat
GWpS				TraesCS5B02G494800	662594115	662596754	Leucine-rich repeat
GWpS	WTa_0b179c	5B	662643501	TraesCS5B02G494900	662644423	662646617	S-adenosyl-L-methionine-dependent methyltransferase
GWpS				TraesCS5B02G495000	662851150	662856702	O-acyltransferase, WSD1, N-terminal
GWpS	WTa_051908	4B	58784128	TraesCS4B02G065700	58597721	58599609	RNA recognition motif domain
GWpS				TraesCS4B02G065800	58744509	58755136	tRNA ligase 1
GWpS				TraesCS4B02G065900	58781653	58785591	DNA/RNA-binding protein Alba-like
GWpS				TraesCS4B02G066000	58925787	58928009	Glycosyl hydrolase, five-bladed beta-propellor domain superfamily
GWpS				TraesCS4B02G066100	58955455	58957402	Protein of unknown function DUF247, plant
GWpS	WTa_03e790	3B	168267016	TraesCS4B02G066200	58978798	58979241	Concanavalin A-like lectin/glucanase domain superfamily
GWpS				TraesCS3B02G167600	168137653	168138400	Histone H4
GWpS				TraesCS3B02G167700	168140013	168140422	Histone-fold
GWpS				TraesCS3B02G167800	168266539	168275494	Alpha-1,2-mannosyltransferase ALG9-like
GWpS	WTa_09003d	7B	593558260	TraesCS3B02G167900	168506026	168508359	Domain of unknown function DUF1618
GWpS				TraesCS7B02G339000	593342211	593350938	Glutamate/phenylalanine/leucine/valine dehydrogenase, C-terminal
GWpS				TraesCS7B02G339100	593400759	593406032	Rx, N-terminal
GWpS				TraesCS7B02G339200	593411044	593416887	NB-ARC
GWpS	WTa_07a6c3	6B	615641048	TraesCS7B02G339300	593639457	593646500	RNA polymerase I specific transcription initiation factor RRN3
GWpS				TraesCS6B02G350400	615605331	615606561	AP2/ERF domain
GWpS				TraesCS6B02G350500	615636611	615638202	Chlorophyll a/b binding domain superfamily
GWpS	WTa_0670f3	5B	657414328	TraesCS6B02G350600	615638072	615641589	Xyloglucan fucosyltransferase
GWpS				TraesCS5B02G486000	657336556	657340310	PMR5 N-terminal domain
GWpS				TraesCS5B02G486200	657590269	657595187	FLC EXPRESSOR/FLX-like
GWpS	WTa_006e2e	1A	533759095	TraesCS5B02G486100	657414105	657420464	PMR5 N-terminal domain
GWpS				TraesCS1A02G348500	533732274	533734650	Lactate/malate dehydrogenase, N-terminal
GWpS				TraesCS1A02G348100	533665749	533671587	Zinc finger C2H2 superfamily
GWpS				TraesCS1A02G348600	533740600	533742853	WRKY domain
GWpS				TraesCS1A02G348300	533694570	533697025	Ribosomal protein L20, C-terminal
GWpS				TraesCS1A02G348400	533698309	533703650	Proteasome/cyclosome repeat
GWpS	WTa_06cb75	6A	22023289	TraesCS1A02G348200	533686974	533693952	Zinc finger C2H2 superfamily
GWpS				TraesCS6A02G041700	22021274	22023743	Catalase haem-binding site
GWpS				TraesCS6A02G041800	22070862	22072043	Isopenicillin N synthase-like
GWpS				TraesCS6A02G041900	22168247	22170677	Tyrosinase copper-binding domain
GWpS				TraesCS6A02G042000	22171763	22173091	Serpin superfamily, domain 2
GWpS				TraesCS6A02G042100	22192196	22193457	Serpin family
GWpS				TraesCS6A02G042200	22199707	22200977	Serpin superfamily, domain 1
GWpS	WTa_01be0b	2A	649562157	TraesCS6A02G042300	22260290	22265154	Glycoside hydrolase, family 27
GWpS				TraesCS2A02G396000	649502331	649505512	FAD-binding 8
GWpS				TraesCS2A02G396200	649619316	649621811	Fatty acid hydroxylase
GWpS				TraesCS2A02G395800	649483814	649486556	Protein of unknown function DUF604
GWpS				TraesCS2A02G395900	649487344	649495229	Mechanosensitive ion channel MscS domain superfamily
GWpS	WTa_0593d5	5A	413411110	TraesCS2A02G396300	649627880	649628905	Protein SPIRAL1-like
GWpS				TraesCS5A02G203700	413190976	413194117	CENP-V/GFA domain
GWpS				TraesCS5A02G203800	413222701	413228055	Integrator complex subunit 11, MBL-fold
GWpS				TraesCS5A02G204100	413409682	413415847	SprT-like
GWpS				TraesCS5A02G204200	413417141	413422267	XPC-binding domain superfamily
GWpS	WTa_034e48	3A	100958142	TraesCS5A02G204300	413427902	413430594	Cytochrome P450
GWpS				TraesCS3A02G124500	100828204	100831024	Putative RNA methylase domain
GWpS				TraesCS3A02G124600	100834044	100834882	Prefoldin
GWpS				TraesCS3A02G124700	100841262	100844726	UDP-glucuronosyl/UDP-glucosyltransferase
GWpS				TraesCS3A02G124900	100847782	100848950	Aspartic peptidase domain superfamily
GWpS				TraesCS3A02G125100	100877847	100879822	UDP-glucuronosyl/UDP-glucosyltransferase
GWpS				TraesCS3A02G125200	100880788	100882863	UDP-glycosyltransferase family, conserved site
GWpS				TraesCS3A02G125300	100885506	100893368	CBS domain
GWpS				TraesCS3A02G125500	100958315	100959970	UDP-glucuronosyl/UDP-glucosyltransferase
NSpP	WTa_02822a	2B	657791466	TraesCS2B02G463800	657790256	657793959	Helix-loop-helix DNA-binding domain superfamily
NSpP				TraesCS2B02G463900	657812301	657818610	PWWP domain
NSpP				TraesCS2B02G464000	657842837	657845275	EGF-type aspartate/asparagine hydroxylation site
NSpP				TraesCS2B02G464100	657850507	657854763	EGF-type aspartate/asparagine hydroxylation site
NSpP				TraesCS5A02G401200	594080964	594081956	Zinc finger C2H2 superfamily
NSpP				TraesCS5A02G401300	594132650	594134217	Myc-type, basic helix-loop-helix (bHLH) domain
NSpP	WTa_05d264	5A	594136607	TraesCS5A02G401400	594136848	594145296	Protein kinase, ATP binding site
NSpP				TraesCS5A02G401500	594321537	594326967	SWIB/MDM2 domain
NSpP				TraesCS5A02G401600	594350559	594352963	SANT/Myb domain
NSpP				TraesCS3B02G048700	24749736	24750230	Alpha crystallin/Hsp20 domain
NSpP				TraesCS3B02G048800	24788101	24789016	Small heat shock protein HSP20
NSpP				TraesCS3B02G048900	24818543	24819647	Short-chain dehydrogenase/reductase SDR
NSpP				TraesCS3B02G049000	24832970	24833826	Protein of unknown function DUF674
NSpP	WTa_03c99d	3B	24923814	TraesCS3B02G049100	24911564	24944677	Protein kinase domain
NSpP				TraesCS3B02G049800	25056254	25057165	Alpha crystallin/Hsp20 domain
NSpP				TraesCS3B02G049900	25121718	25122173	Alpha crystallin/Hsp20 domain
NSpP				TraesCS3B02G050100	25167186	25171486	TRAF-like
NSpP				TraesCS1A02G044400	25479523	25485325	Ankyrin repeat
NSpP	WTa_001a74	1A	25544603	TraesCS1A02G044500	25539196	25545141	YTH domain
NSpP				TraesCS1A02G044600	25545346	25546110	Dihydroneopterin aldolase
NSpP				TraesCS1A02G044700	25679192	25680091	Actin-crosslinking
NSpP				TraesCS1A02G044800	25701413	25709229	UAA transporter
NSpP				TraesCS1A02G044900	25710162	25714282	Transcription factor, MADS-box
NSpP				TraesCS1A02G045000	25791245	25795227	Transcription factor, MADS-box superfamily
NSpP				TraesCS6B02G444800	707110069	707114631	K Homology domain, type 1 superfamily
NSpP				TraesCS6B02G445100	707206436	707208319	Cytochrome P450
NSpP				TraesCS6B02G445200	707223858	707225842	Bulb-type lectin domain superfamily
NSpP				TraesCS6B02G445300	707243924	707245576	Leucine-rich repeat domain superfamily
NSpP				TraesCS6B02G445400	707246945	707250303	P-loop containing nucleoside triphosphate hydrolase
NSpP				TraesCS6B02G445500	707265151	707268003	Rx, N-terminal
NSpP	WTa_07cafc	6B	707292393	TraesCS6B02G445600	707291326	707298195	Ribonuclease H-like superfamily
NSpP				TraesCS6B02G445700	707304295	707311067	Kinesin motor domain
NSpP				TraesCS6B02G445800	707315787	707316584	Leucine-rich repeat domain superfamily
NSpP				TraesCS6B02G445900	707321675	707325091	P-loop containing nucleoside triphosphate hydrolase
NSpP				TraesCS6B02G446000	707326336	707327094	Leucine-rich repeat domain superfamily
NSpP				TraesCS6B02G446100	707382225	707393567	Rx, N-terminal
NSpP				TraesCS6B02G446300	707442010	707442497	Pathogenesis-related protein-4
NSpP				TraesCS6B02G446400	707500081	707506246	Barwin domain
NSpP				TraesCS4B02G026000	19719798	19728793	Ubiquitin-conjugating enzyme E2
NSpP				TraesCS4B02G026100	19735451	19738202	Glycoside hydrolase, family 3, N-terminal domain superfamily
NSpP				TraesCS4B02G026200	19739754	19744164	WD40 repeat
NSpP				TraesCS4B02G026300	19745115	19752157	Protein phosphatase 2A, regulatory B subunit, B56
NSpP	WTa_051147	4B	19755397	TraesCS4B02G026400	19754236	19759464	Zinc finger, CCHC-type superfamily
NSpP				TraesCS4B02G026500	20000991	20003268	Nodulin-like
NSpP	WTa_036372	3A	485000703	TraesCS3A02G262100	484990152	485011560	Protein kinase domain
NSpP				TraesCS3A02G262400	485011944	485015135	Alpha/Beta hydrolase fold
NSpP				TraesCS2B02G609700	789681302	789683163	Protein of unknown function DUF167
NSpP				TraesCS2B02G609800	789683223	789686930	Isopropylmalate dehydrogenase
NSpP				TraesCS2B02G609900	789692169	789694277	Pentatricopeptide repeat
NSpP				TraesCS2B02G610000	789695301	789697412	Protein kinase domain
NSpP	WTa_02ca54	2B	789867892	TraesCS2B02G610200	789869248	789874925	Protein kinase domain
NSpP				TraesCS2B02G610300	789949968	789951203	F-box domain
NSpP				TraesCS2B02G610400	789964524	789965745	Ccc1 family
PH				TraesCS4D02G035200	15911931	15916180	Lipoxygenase
PH				TraesCS4D02G035300	15927016	15929136	F-box domain
PH				TraesCS4D02G035500	15963890	15967257	Pentatricopeptide repeat
PH				TraesCS4D02G035700	16016531	16019492	HAD hydrolase, subfamily IA
PH				TraesCS4D02G035800	16020855	16022009	Prp18
PH				TraesCS4D02G035900	16052840	16063288	HEAT repeat
PH				TraesCS4D02G036000	16098177	16105037	Ethylene-insensitive protein 2
PH				TraesCS4D02G036100	16146441	16147710	ELO family
PH	WTa_056214	4D	16156318	TraesCS4D02G036300	16154026	16154899	Protein of unknown function DUF1764, eukaryotic
PH				TraesCS4D02G036400	16231200	16235987	GAF domain
PH				TraesCS4D02G036500	16244817	16251468	Phosphatidylinositol-4-phosphate 5-kinase, N-terminal
PH				TraesCS4D02G036600	16252285	16253234	Cysteine peptidase, cysteine active site
PH				TraesCS4D02G036700	16256840	16261317	Papain-like cysteine endopeptidase
PH				TraesCS4D02G036800	16260207	16260653	Peptidase C1A, papain C-terminal
PH				TraesCS4D02G036900	16264532	16265637	Papain-like cysteine endopeptidase
PH				TraesCS4D02G037000	16301263	16302368	Cysteine peptidase, cysteine active site
PH				TraesCS4D02G037100	16305621	16306726	Papain-like cysteine endopeptidase
PH				TraesCS4D02G037200	16326502	16327607	Cysteine peptidase, cysteine active site
PH				TraesCS4D02G037300	16331015	16332120	Papain-like cysteine endopeptidase
PH				TraesCS4D02G037400	16334772	16335870	Peptidase C1A, papain C-terminal
PH				TraesCS4D02G037500	16345904	16347009	Papain-like cysteine endopeptidase
PH				TraesCS4D02G037600	16353367	16353819	Peptidase C1A, papain C-terminal
PH				TraesCS4D02G037700	16355471	16361346	Pinin
PH				TraesCS4D02G037800	16365105	16367240	UDP-glucuronosyl/UDP-glucosyltransferase
PH				TraesCS4D02G037900	16368244	16370110	UDP-glycosyltransferase family, conserved site
PH	WTa_I01103f	6B	155547540	TraesCS6B02G151700	155549819	155552822	NB-ARC
PH				TraesCS6B02G151800	155751568	155757773	Protein of unknown function DUF2343
PH				TraesCS6B02G151900	155759318	155777793	RNA polymerase, alpha subunit
PH				TraesCS5B02G180800	328364586	328367861	Sugar/inositol transporter
PH	WTa_061eb6	5B	328772681	TraesCS5B02G180900	328371308	328375058	Ubiquitin-conjugating enzyme, active site
PH				TraesCS1D02G065000	46392071	46397654	NA
PH	WTa_013fe4	1D	46631889	TraesCS1D02G065300	46631910	46635411	Glycosyl transferase, family 20
PH				TraesCS1D02G065400	46644064	46644948	Domain unknown function DUF295
PH				TraesCS7A02G040500	18792217	18795483	Pectinacetylesterase/NOTUM
PH				TraesCS7A02G040600	18874137	18875189	Transcription initiation factor TFIID subunit 8
PH				TraesCS7A02G040700	18877009	18883267	PAZ domain
PH				TraesCS7A02G040800	18993714	18997367	Armadillo-like helical
PH	WTa_081dd6	7A	19005839	TraesCS7A02G040900	19002179	19007777	Sucrose synthase
PH				TraesCS7A02G041000	19016906	19026849	Virus X resistance protein-like, coiled-coil domain
PH				TraesCS7A02G041100	19082580	19083963	C2 domain superfamily
PH				TraesCS7A02G041200	19174161	19178855	Cytochrome P450
PH				TraesCS7A02G041300	19218992	19222512	Papain-like cysteine peptidase superfamily
PH				TraesCS7A02G041400	19251537	19252302	Late embryogenesis abundant protein At5g17165-like
PH				TraesCS7A02G041500	19253728	19259576	GDSL lipase/esterase
PH				TraesCS1A02G364800	544389268	544392159	Glycoside hydrolase, family 28
PH				TraesCS1A02G363900	544139176	544140713	Ribosomal protein S16
PH				TraesCS1A02G364000	544176614	544177763	Late embryogenesis abundant protein, LEA_4 subgroup
PH				TraesCS1A02G364100	544194412	544199126	Late embryogenesis abundant protein, LEA_4 subgroup
PH				TraesCS1A02G364200	544199764	544204085	START domain
PH				TraesCS1A02G364500	544364546	544368971	Saposin-like
PH	WTa_00741e	1A	544376641	TraesCS1A02G364600	544370915	544376553	BRCC36, C-terminal helical domain
PH				TraesCS1A02G364700	544377730	544379003	Protein of unknown function DUF4666
PH				TraesCS1A02G364900	544427976	544431987	Leucine-rich repeat
PH				TraesCS1A02G365000	544434136	544434582	Domain of unknown function DUF4283
PH				TraesCS1A02G365100	544465438	544475283	C2 domain superfamily
PH				TraesCS1A02G365200	544486925	544489217	Glycoside hydrolase, family 28
PH				TraesCS1A02G365300	544492734	544494956	Pectin lyase fold
PH				TraesCS1A02G365400	544495226	544496670	IRX15/IRX15L/IGXM
PH				TraesCS1A02G365500	544583341	544584291	Invertase/pectin methylesterase inhibitor domain superfamily
PH				TraesCS1A02G365600	544585320	544588835	AP-2 complex subunit mu, C-terminal superfamily
PH				TraesCS1A02G365700	544594494	544602413	WD40 repeat
PH				TraesCS1A02G365800	544602849	544606901	Farnesyl pyrophosphate synthase-like
PH				TraesCS2D02G597100	649676849	649677935	BTB/POZ domain
PH				TraesCS2D02G596800	649585441	649586157	Ovate protein family, C-terminal
PH				TraesCS2D02G596900	649593590	649598341	Protein kinase domain
PH				TraesCS2D02G597000	649615057	649616535	Pepsin-like domain, plant
PH				TraesCS2D02G597200	649705631	649706614	Ribonuclease CAF1
PH				TraesCS2D02G597300	649780835	649781785	Proteolipid membrane potential modulator
PH				TraesCS2D02G597400	649812153	649812410	NA
PH	WTa_032537	2D	649817199	TraesCS2D02G597500	649813225	649821813	Tetratricopeptide-like helical domain superfamily
PH				TraesCS2D02G597600	650059646	650067018	Tetratricopeptide-like helical domain superfamily
PedL				TraesCS6B02G184300	207105347	207110770	Protein kinase domain
PedL				TraesCS6B02G184400	207154367	207155776	VQ motif-containing protein 15/22
PedL	WTa_07771c	6B	207106691	TraesCS6B02G184500	207160702	207166541	Cytochrome P450
PedL				TraesCS1D02G327700	419733865	419745002	MATH/TRAF domain
PedL				TraesCS1D02G327300	419478982	419480527	Domain of unknown function DUF1618
PedL				TraesCS1D02G327500	419717234	419723448	Thioredoxin-like superfamily
PedL	WTa_014dfc	1D	419727871	TraesCS1D02G327600	419724244	419729005	P-loop containing nucleoside triphosphate hydrolase
PedL				TraesCS1D02G327800	419965572	419968594	Protein of unknown function DUF594
PedL	WTa_030fec	2D	607934208	TraesCS2D02G516500	607933268	607938429	Zinc finger, UBP-type
PedL				TraesCS2D02G516600	607955544	607958443	Zinc finger, UBP-type
PedL				TraesCS2D02G516700	607960348	607961901	Leucine-rich repeat
PedL				TraesCS2D02G516800	607964028	607964695	Leucine-rich repeat
PedL				TraesCS2D02G516900	607970384	607973781	Leucine-rich repeat
PedL				TraesCS2D02G517000	607986836	607997092	Helix-loop-helix DNA-binding domain superfamily
PedL				TraesCS2D02G517100	608183938	608187389	Leucine-rich repeat
PedL				TraesCS7D02G091500	54834408	54837690	ssDNA-binding transcriptional regulator
PedL				TraesCS7D02G091600	54922050	54927058	MFS transporter superfamily
PedL				TraesCS7D02G091700	54989394	54990651	2-hydroxy-palmitic acid dioxygenase Mpo1-like
PedL				TraesCS7D02G091800	55005826	55008813	F-box-like domain superfamily
PedL				TraesCS7D02G091900	55012084	55013253	F-box domain
PedL				TraesCS7D02G092000	55014729	55015426	F-box-like domain superfamily
PedL	WTa_0953c0	7D	55072906	TraesCS7D02G092100	55072046	55075360	GDP-fucose protein O-fucosyltransferase
PedL				TraesCS7D02G092200	55221574	55222652	2-hydroxy-palmitic acid dioxygenase Mpo1-like
PedL				TraesCS7D02G092300	55249830	55253911	WRKY domain superfamily
PedL				TraesCS7D02G092400	55267043	55271018	WRKY domain
PedL				TraesCS6B02G263100	474173211	474176246	BRO1 domain
PedL				TraesCS6B02G263200	474176950	474180168	Alcohol dehydrogenase, zinc-type, conserved site
PedL	WTa_079008	6B	474180265	TraesCS6B02G263300	474187135	474192702	Protein of unknown function DUF639
PedL				TraesCS6B02G263400	474269609	474273610	NA
PedL				TraesCS6B02G263500	474428047	474429307	Uncharacterized protein At1g65710-like
PedL				TraesCS7B02G290300	526677110	526680136	B-cell receptor-associated protein 29/31
PedL				TraesCS7B02G290400	526715266	526717809	Protein kinase domain
PedL	WTa_0bb95e	7B	526853853	TraesCS7B02G290600	526864830	526868385	GDSL lipase/esterase
PedL				TraesCS7B02G290700	526882803	526884658	Protein kinase-like domain superfamily
PedL				TraesCS7B02G290800	527036147	527038781	Uncharacterized membrane protein At1g16860-like
PedL	WTa_042128	3B	621145777	TraesCS3B02G394200	621297150	621298293	SANT/Myb domain
PedL				TraesCS5B02G504300	670524882	670525948	Thioredoxin domain
PedL	WTa_0675d1	5B	670536374	TraesCS5B02G504400	670533364	670538006	Zinc finger, PHD-type
PedL				TraesCS7A02G102400	62878982	62882679	Nucleosome assembly protein (NAP)
PedL				TraesCS7A02G102600	63053053	63058301	Acetyl-coenzyme A carboxyltransferase, N-terminal
PedL				TraesCS7A02G102700	63082023	63084811	Tryptophan synthase beta subunit-like PLP-dependent enzyme
PedL	WTa_083302	7A	63111598	TraesCS7A02G102800	63110427	63113412	Pyridoxal-phosphate dependent enzyme
PedL				TraesCS7A02G102900	63117708	63118134	Histone-fold
PedL				TraesCS7A02G103000	63125013	63127930	EGF-type aspartate/asparagine hydroxylation site
PedL				TraesCS7A02G103100	63307614	63308288	Chloramphenicol acetyltransferase-like domain superfamily
PedL				TraesCS7A02G103200	63358127	63359964	NB-ARC
PedL				TraesCS7A02G103300	63361378	63362967	Rx, N-terminal
PedL				TraesCS7A02G273600	287238207	287243420	Domain of unknown function DUF632
PedL				TraesCS7A02G273700	287253784	287254500	Protein of unknown function DUF241, plant
PedL	WTa_08625d	7A	287473300	TraesCS7A02G273800	287472715	287473723	Protein of unknown function DUF241, plant
PedL				TraesCS7A02G273900	287482908	287483447	Protein of unknown function DUF241, plant
PedL				TraesCS7A02G274000	287484947	287485826	Protein of unknown function DUF241, plant
PedL				TraesCS7A02G274100	287492083	287493067	Protein of unknown function DUF241, plant
PedL				TraesCS7A02G274200	287499669	287500595	Protein of unknown function DUF241, plant
PedL				TraesCS7A02G274300	287521610	287522354	Protein of unknown function DUF241, plant
PedL				TraesCS7A02G274400	287526362	287527383	Protein of unknown function DUF241, plant
PedL				TraesCS7A02G274500	287550805	287551770	Protein of unknown function DUF241, plant
PedL				TraesCS7A02G274600	287552184	287553136	Protein of unknown function DUF241, plant
PedL				TraesCS7A02G274700	287613013	287614188	Myb/SANT-like domain
PedL				TraesCS7A02G274800	287638275	287638763	Zinc finger, RING-type
PedL	WTa_064c52	5B	538296907	TraesCS5B02G358500	538293191	538300898	ATPase, nucleotide binding domain
PedL				TraesCS5B02G358600	538541865	538548795	Zinc finger C2H2-type
DH				TraesCS6B02G451100	710001532	710007317	PA domain
DH	WTa_07ce05	6B	710098674	TraesCS6B02G451200	710095330	710101651	Phosphatidylinositol-4-phosphate 5-kinase, core
DH				TraesCS6B02G451300	710102321	710106188	NAC domain
DH				TraesCS6B02G451500	710149424	710152200	F-box-like domain superfamily
DH				TraesCS6B02G451600	710200150	710202013	F-box-like domain superfamily
DH				TraesCS6B02G451700	710228528	710230349	F-box domain
DH				TraesCS6B02G451800	710317198	710319247	F-box-like domain superfamily
DH				TraesCS5B02G471100	644843194	644844618	UDP-glycosyltransferase family, conserved site
DH				TraesCS5B02G471200	644848790	644850060	Thionin
DH				TraesCS5B02G471300	644854426	644855491	Thionin-like superfamily
DH				TraesCS5B02G471500	644872652	644875986	Calcineurin-like phosphoesterase domain, ApaH type
DH	WTa_066e88	5B	644886023
DH				TraesCS5B02G471700	644889114	644890701	PsbQ-like domain superfamily
DH				TraesCS5B02G471600	644885383	644889039	Major facilitator superfamily
DH				TraesCS5B02G471900	644943166	644943849	Transcription factor, MADS-box
DH				TraesCS5B02G472000	645062362	645063000	BTB/POZ domain
DH				TraesCS7A02G048500	22866609	22869256	ClpA/B family
DH				TraesCS7A02G048600	22886291	22888868	Manganese/iron superoxide dismutase, N-terminal domain superfamily
DH	WTa_0b8e70	7A	22919368	TraesCS7A02G048700	22892858	22896357	Protein CYCLOPS
DH				TraesCS7A02G049100	22937762	22943978	Growth-regulating factor
DH				TraesCS7A02G049200	22944306	22948002	Target SNARE coiled-coil homology domain
DH				TraesCS7A02G049300	22961615	22964184	Target SNARE coiled-coil homology domain
DH				TraesCS7A02G049400	22975903	22976996	Glutathione S-transferase, C-terminal domain superfamily
DH				TraesCS7A02G155700	108750501	108753356	Pentatricopeptide repeat
DH				TraesCS7A02G155800	108766251	108768905	Transcription initiation factor IIE subunit alpha, N-terminal
DH				TraesCS7A02G155900	108807604	108809382	Ribosomal protein L35A superfamily
DH				TraesCS7A02G156000	108809631	108817306	ATP synthase, F1 complex, gamma subunit
DH				TraesCS7A02G156100	108817377	108818446	Glycosyl transferase, family 31
DH	WTa_084254	7A	108952429	TraesCS7A02G156300	108948203	108952486	Type II CAAX prenyl endopeptidase Rce1-like
DH				TraesCS7B02G372100	637914145	637916317	SANT/Myb domain
DH				TraesCS7B02G372200	637949076	637951074	Myb domain
DH				TraesCS7B02G372300	638066058	638070449	Protein JASON
DH	WTa_0909f5	7B	638074315	TraesCS7B02G372400	638070498	638077269	Aminotransferase class V domain
DH				TraesCS7B02G372500	638129515	638134455	SANT/Myb domain
DH
DH				TraesCS1B02G401300	631817925	631821586	Oligopeptide transporter, OPT superfamily
DH				TraesCS1B02G401400	631822128	631826952	NAD(P)-binding domain superfamily
DH				TraesCS1B02G401500	631824771	631825835	Protein kinase domain
DH				TraesCS1B02G401600	631829400	631834179	Tetrapeptide transporter, OPT1/isp4
DH				TraesCS1B02G401700	631966428	631967910	SANT/Myb domain
DH				TraesCS1B02G401800	631998104	632003904	Target SNARE coiled-coil homology domain
DH	WTa_0110b7	1B	632003888	TraesCS1B02G401900	632003412	632007555	Thioredoxin-like superfamily
DH				TraesCS1B02G402000	632009540	632011743	FAS1 domain superfamily
DH				TraesCS1B02G402100	632014277	632018299	Leucine-rich repeat domain superfamily
DH				TraesCS1B02G402200	632145930	632156551	Leucine-rich repeat
DH	WTa_075c1e	6B	100355529	TraesCS6B02G115200	100288428	100291300	Bile acid:sodium symporter/arsenical resistance protein Acr3
DH				TraesCS2B02G115300	78811000	78812220	VQ
DH	WTa_02278f	2B	78829529	TraesCS2B02G115500	78830147	78831053	Zinc finger, RING-type
DH				TraesCS6B02G405000	680528600	680532089	F-box domain
DH				TraesCS6B02G405200	680539973	680550188	-alpha-acetyltransferase 35, NatC auxiliary subunit
DH				TraesCS6B02G405400	680700959	680704177	F-box-like domain superfamily
DH				TraesCS6B02G405500	680704939	680707505	F-box-like domain superfamily
DH				TraesCS6B02G405600	680725260	680725976	Alpha/Beta hydrolase fold
DH				TraesCS6B02G405700	680726871	680729775	Peptidase S54, rhomboid domain
DH	WTa_07bb5b	6B	680730211	TraesCS6B02G405800	680731540	680739044	F-box domain
DH				TraesCS6B02G405900	680766211	680768098	Cytochrome P450 superfamily
DH				TraesCS6B02G406000	680777368	680781907	Alcohol dehydrogenase, zinc-type, conserved site
DH				TraesCS6B02G406100	680795674	680798587	Proton-dependent oligopeptide transporter family
DH				TraesCS6B02G406200	680809098	680814154	NAD(P)-binding domain superfamily
DH				TraesCS6B02G406300	680858133	680862890	Alcohol dehydrogenase, zinc-type, conserved site
DH				TraesCS6B02G406400	680894278	680896178	Cytochrome P450
DH				TraesCS6B02G406500	680931352	680936395	F-box domain
DH				TraesCS1D02G271900	366020074	366020391	Zinc-ribbon 15
DH				TraesCS1D02G271300	365845849	365846933	Modifying wall lignin-1/2
DH				TraesCS1D02G271400	365850755	365852334	Modifying wall lignin-1/2
DH	WTa_0149bf	1D	365985894	TraesCS1D02G271600	365996684	365997698	Modifying wall lignin-1/2
DH				TraesCS1D02G271200	365794621	365796138	Modifying wall lignin-1/2
DH				TraesCS1D02G271100	365790510	365791965	Modifying wall lignin-1/2
DH				TraesCS1D02G271800	366018501	366020509	Modifying wall lignin-1/2
DH				TraesCS1D02G271700	366005767	366006893	Modifying wall lignin-1/2
DH				TraesCS1D02G271500	365965396	365988557	Protein kinase domain
DH				TraesCS1D02G272100	366223388	366225410	Yip1 domain
DH				TraesCS1D02G272300	366234319	366239015	RNA recognition motif domain
GPC	WTa_008783	1A	587360393	TraesCS1A02G437600	587359674	587362070	cysteine dioxygenase activity
GPC				TraesCS1A02G437600	587384725	587387840	GTP binding
GPC				TraesCS1A02G437700	587384725	587387840	GTPase activity
GPC	WTa_0988eb	1A	585628300	TraesCS1A02G435200	585821205	585823526	ATP binding
GPC				TraesCS1A02G434800	585821205	585823526	protein kinase activity
GPC				TraesCS1A02G435300	585821205	585823526	protein tyrosine kinase activity
GPC				TraesCS1A02G434900	585625902	585628146
GPC	WTa_0086e0	1A	585628461	TraesCS1A02G435200	585821205	585823526	ATP binding
GPC				TraesCS1A02G434800	585821205	585823526	protein kinase activity
GPC				TraesCS1A02G435300	585821205	585823526	protein tyrosine kinase activity
GPC				TraesCS1A02G434900	585625902	585628146
GPC	WTa_00e9ba	1B	470421960	TraesCS1B02G267300	470306416	470308171	transmembrane transporter activity
GPC				TraesCS1B02G267200	470295030	470300941	microtubule cytoskeleton organization
GPC	WTa_016bcc	2A	31071558	TraesCS2A02G070000	30857277	30859136	oxidoreductase activity
GPC				TraesCS2A02G070100	30864683	30866134	UDP-glycosyltransferase activity
GPC				TraesCS2A02G070200	30868912	30870531	serine-type carboxypeptidase activity
GPC				TraesCS2A02G070300	31072385	31077509	metal ion binding
GPC	WTa_016bfd	2A	31085080	TraesCS2A02G070000	31083834	31089923	glycerol-3-phosphate dehydrogenase (quinone) activity
GPC				TraesCS2A02G070100	31083834	31089923	cellular metabolic process
GPC				TraesCS2A02G070200	31083834	31089923	organic substance metabolic process
GPC				TraesCS2A02G070200	31163445	31169129	ADP binding
GPC				TraesCS2A02G070300	31172760	31177459	ADP binding
GPC				TraesCS2A02G070300	31200811	31202547	UDP-glycosyltransferase activity
GPC	WTa_016bee	2A	31081634	TraesCS2A02G070000	30868912	30870531	proteolysis
GPC				TraesCS2A02G070100	31072385	31077509	metal ion binding
GPC				TraesCS2A02G070200	31072385	31077509	chloroplast
GPC				TraesCS2A02G070300	31072385	31077509	methylglyoxal catabolic process to D-lactate via S-lactoyl-glutathione
GPC				TraesCS2A02G070400	31083834	31089923	mitochondrion
GPC	WTa_016c18	2A	31167305	TraesCS2A02G070300	31172760	31177459	ADP binding
GPC				TraesCS2A02G070300	31200811	31202547	hexosyltransferase activity
GPC	WTa_0201bd	2B	5529420	TraesCS2B02G009300	5430438	5430752	integral component of membrane
GPC				TraesCS2B02G009400	5479231	5483853	NA
GPC				TraesCS2B02G009500	5579123	5580448	NA
GPC				TraesCS2B02G009600	5592643	5593403	NA
GPC				TraesCS2B02G009700	5596473	5596973	NA
GPC				TraesCS2B02G009800	5603620	5604192	NA
GPC				TraesCS2B02G009900	5608373	5612953	nucleic acid binding
GPC				TraesCS2B02G010000	5628214	5630093	N,N-dimethylaniline monooxygenase activity
GPC				TraesCS2B02G010100	5628214	5630093	flavin adenine dinucleotide binding
GPC	WTa_02013f	2B	4966055	TraesCS2B02G008000	4923626	4924189	NA
GPC				TraesCS2B02G008100	4984078	4990934	intracellular protein transport
GPC				TraesCS2B02G008200	4984078	4990934	zinc ion binding
GPC				TraesCS2B02G008300	4984078	4990934	regulation of cell size
GPC	WTa_073b3a	6B	4856971	TraesCS6B02G007000	4825776	4826747	NA
GPC				TraesCS6B02G007100	4849557	4849971	NA
GPC				TraesCS6B02G007200	4856455	4857452	NA
GPC				TraesCS6B02G007300	4859436	4863659	translation initiation factor activity
GPC				TraesCS6B02G007400	4873125	4877529	integral component of membrane
GPC				TraesCS6B02G007500	4884362	4885288	NA
GPC				TraesCS6B02G007600	4888821	4889779	NA
GPC				TraesCS6B02G007700	4943133	4944595	lipid metabolic process
GPC				TraesCS6B02G007800	4971351	4972995	carbohydrate binding
GPC				TraesCS6B02G007900	5029276	5030946	carbohydrate binding
GPC				TraesCS6B02G008000	5071319	5072906	protein binding
GPC				TraesCS6B02G008100	5101243	5102621	chlorophyll catabolic process
GPC	WTa_078f94	6B	471508328	TraesCS6B02G262000	471675673	471676886	ATP-dependent peptidase activity
GPC				TraesCS6B02G261900	471628682	471631085	NA
Well-watered
GY	WTa_01a98f	2A	515294908	TraesCS2A02G299400	515292584	515295492	Protein kinase domain
GY				TraesCS2A02G299500	515298568	515300979	Bulb-type lectin domain superfamily
GY				TraesCS2A02G299600	515302068	515305326	Protein kinase domain
GY				TraesCS2A02G299700	515308820	515311685	Bulb-type lectin domain superfamily
GY				TraesCS2A02G299800	515314183	515322741	Ubiquitin interacting motif
GY				TraesCS2A02G299900	515452029	515453761	Protein of unknown function DUF1677, Oryza sativa
GY				TraesCS2A02G300000	515492022	515496912	Papain-like cysteine peptidase superfamily
GY	WTa_008782	1A	587359950	TraesCS1A02G437600	587359674	587362070	RmlC-like cupin domain superfamily
GY				TraesCS1A02G437700	587384725	587387840	Tubulin
GY				TraesCS7D02G402600	520272158	520272923	Glycine-rich cell wall structural protein 1/2
GY				TraesCS7D02G402700	520279915	520280481	Glycine-rich cell wall structural protein 1/2
GY				TraesCS7D02G403000	520386472	520390914	Citrate synthase
GY				TraesCS7D02G403100	520399484	520402830	WAT1-related protein
GY	WTa_0bda7d	7D	520404662	TraesCS7D02G403300	520405786	520408608	Cyclophilin-type peptidyl-prolyl cis-trans isomerase domain
GY				TraesCS7D02G403400	520411153	520413663	Retrieval of early ER protein Rer1
GY				TraesCS7D02G403500	520414033	520419250	Type 2 DNA topoisomerase 6 subunit B-like, plants
GY				TraesCS7D02G403600	520516009	520520670	Alpha/beta hydrolase fold-3
GY				TraesCS5A02G341500	547543449	547544912	F-box-like domain superfamily
GY				TraesCS5A02G341600	547595822	547598236	F-box-like domain superfamily
GY				TraesCS5A02G341700	547600776	547601239	Small auxin-up RNA
GY				TraesCS5A02G341800	547612856	547614515	F-box-like domain superfamily
GY				TraesCS5A02G341900	547634282	547634736	Small auxin-up RNA
GY				TraesCS5A02G342000	547636568	547637362	Small auxin-up RNA
GY				TraesCS5A02G342200	547639943	547640158	Small auxin-up RNA
GY				TraesCS5A02G342300	547641067	547643714	Small auxin-up RNA
GY				TraesCS5A02G342400	547643749	547644219	Small auxin-up RNA
GY				TraesCS5A02G342500	547644978	547645352	Small auxin-up RNA
GY				TraesCS5A02G342600	547646865	547652386	Chaperonin TCP-1, conserved site
GY				TraesCS5A02G342700	547658439	547658837	Bifunctional inhibitor/plant lipid transfer protein/seed storage helical domain superfamily
GY				TraesCS5A02G342800	547711278	547711676	Bifunctional inhibitor/plant lipid transfer protein/seed storage helical domain
GY	WTa_05c00f	5A	547781084	TraesCS5A02G342900	547719061	547723206	Major intrinsic protein
GY				TraesCS5B02G520900	682940395	682940955	Leucine-rich repeat-containing N-terminal, plant-type
GY				TraesCS5B02G521000	682952287	682954803	Domain of unknown function DUF4220
GY	WTa_067bd2	5B	683112009	TraesCS5B02G521100	683109213	683139863	IQ motif, EF-hand binding site
GY				TraesCS5B02G521200	683140395	683147990	Protein kinase domain
GY				TraesCS5B02G521300	683340022	683351358	P-loop containing nucleoside triphosphate hydrolase
GY	WTa_07b954	6B	671455531	TraesCS6B02G395700	671221636	671230621	Lipoxygenase
GY				TraesCS7A02G517100	701528382	701529842	Amino acid transporter, transmembrane domain
GY				TraesCS7A02G517200	701531171	701539084	WD40 repeat
GY				TraesCS7A02G517600	701629056	701635507	Palmitoyltransferase, DHHC domain
GY				TraesCS7A02G517700	701638088	701642904	Pyrophosphate-energised proton pump
GY				TraesCS7A02G517800	701664558	701667775	Carbohydrate-binding-like fold
GY				TraesCS7A02G517900	701680255	701684806	Calcineurin-like phosphoesterase domain, ApaH type
GY				TraesCS7A02G518100	701693276	701695173	Cytochrome P450 superfamily
GY	WTa_0baa8e	7A	701771243	TraesCS7A02G518200	701764017	701771932	Sucrose synthase
GY				TraesCS7A02G518300	701803301	701806216	AdipoR/Haemolysin-III-related
GY				TraesCS4B02G277900	559854826	559856646	Pectinesterase, Asp active site
GY				TraesCS4B02G278000	560007429	560010574	1,2-dihydroxy-3-keto-5-methylthiopentene dioxygenase, eukaryotes
GY	WTa_054080	4B	560014113	TraesCS4B02G278100	560012594	560015080	Heat shock factor (HSF)-type, DNA-binding
GY				TraesCS4B02G278200	560021068	560024394	Deoxyuridine triphosphate nucleotidohydrolase
GY				TraesCS5A02G396500	591313846	591320402	Protein of unknown function DUF863, plant
GY				TraesCS5A02G396600	591432891	591438705	WD40-repeat-containing domain superfamily
GY				TraesCS5A02G396700	591438802	591441179	Domain of unknown function DUF3598
GY				TraesCS5A02G396800	591442651	591446929	WRKY domain
GY	WTa_05d15a	5A	591464435	TraesCS5A02G396900	591463335	591466173	Protein ENHANCED DISEASE RESISTANCE 2, C-terminal
GY				TraesCS5A02G397000	591486434	591488616	Origin recognition complex, subunit 5
GY				TraesCS5A02G397100	591490660	591493200	Protein kinase domain
GY				TraesCS5A02G397200	591635315	591637834	Myc-type, basic helix-loop-helix (bHLH) domain
GY				TraesCS4B02G120100	140701509	140711209	NA
GY	WTa_0523ce	4B	140882310
GY				TraesCS1D02G356200	441007403	441007984	Rx, N-terminal
GY				TraesCS1D02G356300	441009747	441011542	NB-ARC
GY				TraesCS1D02G356400	441011849	441013932	P-loop containing nucleoside triphosphate hydrolase
GY				TraesCS1D02G356500	441015641	441016507	P-loop containing nucleoside triphosphate hydrolase
GY				TraesCS1D02G356600	441017472	441019178	P-loop containing nucleoside triphosphate hydrolase
GY				TraesCS1D02G356700	441031214	441032851	NB-ARC
GY				TraesCS1D02G356800	441033797	441034744	Hexapeptide repeat
GY	WTa_01533d	1D	441076635	TraesCS1D02G356900	441067006	441074814	Glycosyl transferase, family 1
GY				TraesCS1D02G357100	441205214	441207290	NADH:ubiquinone oxidoreductase-like, 20kDa subunit
GY				TraesCS1D02G357200	441296724	441298865	ATP synthase, F0 complex, subunit G, mitochondrial
GY				TraesCS1D02G357300	441299444	441302760	AAA+ ATPase domain
GY				TraesCS1D02G357400	441302762	441305117	Pentatricopeptide repeat
GY				TraesCS1D02G357500	441307030	441309310	Multi antimicrobial extrusion protein
GY	WTa_06112d	5B	129251315	TraesCS5B02G097700	129249670	129258325	Tetrapeptide transporter, OPT1/isp4
GY				TraesCS5B02G097800	129323589	129329122	Leucine-rich repeat, cysteine-containing subtype
GY				TraesCS5B02G097900	129333564	129359269	Oxidoreductase, N-terminal domain
GY				TraesCS1A02G010200	6317837	6324253	Glycoside hydrolase, family 5
GY				TraesCS1A02G010400	6336481	6345966	Leucine-rich repeat
GY				TraesCS1A02G010500	6422072	6423492	Glycosyltransferase 2-like
GY				TraesCS1A02G010600	6438286	6439101	Dirigent protein
GY				TraesCS1A02G010700	6472647	6475129	Ribosomal biogenesis, methyltransferase, EMG1/NEP1
GY				TraesCS1A02G010800	6497878	6500095	Jacalin-like lectin domain
GY	WTa_0006f2	1A	6561598	TraesCS1A02G011100	6566139	6567972	Ribosomal protein S19/S15
GY				TraesCS1A02G011200	6569388	6576401	Serine-threonine protein kinase 19
GY				TraesCS1A02G011300	6654552	6655482	Jacalin-like lectin domain
GY				TraesCS1A02G011400	6760744	6764265	Domain of unknown function DUF1664
GY				TraesCS1A02G011700	6773469	6773978	Zinc finger, RING-type
GY				TraesCS1A02G011800	6788571	6793542	Formin, FH2 domain
GY				TraesCS6D02G316000	424824381	424831634	Protein kinase domain
GY	WTa_07f441	6D	424951300	TraesCS6D02G316100	424950072	424952573	Papain-like cysteine peptidase superfamily
GY				TraesCS6D02G316300	425086995	425088663	Protein of unknown function DUF1677, Oryza sativa
GY				TraesCS6B02G437500	704438159	704442558	F-box domain
GY				TraesCS6B02G437600	704445875	704447975	Ankyrin repeat-containing domain superfamily
GY				TraesCS6B02G437700	704449077	704449925	Zinc finger, RING-type
GY				TraesCS6B02G437800	704450451	704454384	Tetratricopeptide-like helical domain superfamily
GY				TraesCS6B02G437900	704460919	704462825	Chloramphenicol acetyltransferase-like domain superfamily
GY				TraesCS6B02G438000	704561327	704562902	Domain unknown function DUF295
GY				TraesCS6B02G438200	704585234	704594686	NB-ARC
GY	WTa_07c53e	6B	704654149	TraesCS6B02G438300	704653528	704656192	Domain of unknown function DUF4220
GY				TraesCS6B02G438700	704751222	704752255	Lateral organ boundaries, LOB
GY				TraesCS6B02G438800	704788513	704793804	Cytochrome P450
GY				TraesCS6B02G438900	704831910	704833151	Nicotianamine synthase
GY				TraesCS6B02G439100	704851510	704852985	Glycoside hydrolase family 17
GY				TraesCS6B02G439200	704859279	704862485	Leucine-rich repeat domain superfamily
GY				TraesCS6B02G439300	704878920	704881973	Deoxyhypusine hydroxylase
GY				TraesCS6B02G439400	704882165	704886164	Target SNARE coiled-coil homology domain
GY				TraesCS6B02G439500	704890073	704891660	PPC domain
SW	WTa_082bd7	7A	39482275	TraesCS7A02G073900	39480367	39482365	NA
SW				TraesCS7A02G074000	39490547	39491964	NA
SW				TraesCS7A02G074100	39587589	39592990	Pentatricopeptide repeat
SW				TraesCS5A02G012200	8059137	8059307	Short transmembrane mitochondrial protein 1
SW	WTa_056efc	5A	8063176	TraesCS5A02G012300	8062229	8070059	Modifying wall lignin-1/2
SW				TraesCS5A02G012400	8072193	8074870	Modifying wall lignin-1/2
SW				TraesCS5A02G012500	8233156	8239545	Calcium-dependent channel, 7TM region, putative phosphate
SW				TraesCS5A02G012600	8240521	8246498	Calcium-dependent channel, 7TM region, putative phosphate
SW				TraesCS1A02G424700	579677466	579683203	F-box-like domain superfamily
SW				TraesCS1A02G424900	579861533	579863608	Protein kinase domain
SW				TraesCS1A02G424800	579836169	579837583	NA
SW	WTa_0082da	1A	579864365	TraesCS1A02G425000	579864119	579869349	Mitochondrial carrier protein
SW				TraesCS3A02G068700	41117805	41120846	NB-ARC
SW				TraesCS3A02G069000	41180909	41181568	Leucine-rich repeat domain superfamily
SW				TraesCS3A02G069100	41239119	41240093	Leucine-rich repeat domain superfamily
SW	WTa_034238	3A	41367859
SW				TraesCS3A02G069200	41368832	41372790	NB-ARC
SW				TraesCS3A02G069300	41616680	41619866	Rx, N-terminal
SW				TraesCS6A02G048500	24770369	24774002	FBD domain
SW				TraesCS6A02G048600	24828478	24830423	Protein chlororespiratory reduction 6
SW				TraesCS6A02G048700	24838784	24842716	Ionotropic glutamate receptor
SW				TraesCS6A02G048800	24852084	24857645	Plant glutamate receptor, periplasmic ligand-binding domain
SW				TraesCS6A02G048900	24921651	24922607	Gliadin/LMW glutenin
SW	WTa_06cf1e	6A	25019163	TraesCS6A02G049000	25017986	25022413	Ionotropic glutamate receptor
SW				TraesCS6A02G049100	25107550	25108401	Bifunctional inhibitor/plant lipid transfer protein/seed storage helical domain superfamily
SW				TraesCS6A02G049200	25203493	25204413	Gliadin/LMW glutenin
SW	WTa_077da5	6B	252094108	TraesCS6B02G204100	252094255	252100111	Peptidase S1, PA clan
SW				TraesCS6A02G348200	580298978	580302286	Clp, repeat (R) domain
SW	WTa_071380	6A	580538115	TraesCS6A02G348400	580533267	580537934	Amino acid transporter, transmembrane domain
SW				TraesCS6A02G348300	580316422	580320166	Amino acid transporter, transmembrane domain
SW				TraesCS5B02G013500	13269737	13270123	NA
SW				TraesCS5B02G013600	13273023	13280676	GTP binding domain
SW				TraesCS5B02G013800	13361011	13361762	Deoxyuridine triphosphate nucleotidohydrolase
SW				TraesCS5B02G013900	13426752	13436529	LSM domain superfamily
SW	WTa_05fb63	5B	13491417	TraesCS5B02G014000	13484986	13491667	Jacalin-like lectin domain
SW				TraesCS5B02G014100	13496734	13498307	WAT1-related protein
SW				TraesCS5B02G014200	13699155	13702692	Zinc finger, RING-type
SW				TraesCS5B02G014300	13703004	13706334	Protein FERTILITY RESTORER RF2-like
SW				TraesCS5B02G014400	13713254	13716973	Small GTPase
SW				TraesCS5B02G014500	13721754	13726205	Phosphoglycolate phosphatase-like, domain 2
SW				TraesCS6A02G098300	65434224	65437470	Cytidyltransferase-like domain
SW	WTa_06dfe3	6A	65684212	TraesCS6A02G098500	65681325	65684847	CBS domain
SW				TraesCS6A02G098600	65797706	65800777	Chloride channel, core
SW				TraesCS6A02G098700	65801743	65806420	Kinetochore protein Nuf2
SW				TraesCS6A02G098800	65843198	65847127	Winged helix DNA-binding domain superfamily
SW				TraesCS6A02G098900	65856073	65866066	C2 domain
GWpS				TraesCS3A02G068700	41117805	41120846	NB-ARC
GWpS				TraesCS3A02G068800	41149964	41153017	Rx, N-terminal
GWpS				TraesCS3A02G068900	41178317	41179372	NB-ARC
GWpS				TraesCS3A02G069000	41180909	41181568	Leucine-rich repeat domain superfamily
GWpS				TraesCS3A02G069100	41239119	41240093	Leucine-rich repeat domain superfamily
GWpS	WTa_034238	3A	41367859	TraesCS3A02G069200	41368832	41372790	NB-ARC
GWpS				TraesCS3A02G069300	41616680	41619866	Rx, N-terminal
GWpS				TraesCS6A02G048500	24770369	24774002	FBD domain
GWpS				TraesCS6A02G048600	24828478	24830423	Protein chlororespiratory reduction 6
GWpS				TraesCS6A02G048700	24838784	24842716	Ionotropic glutamate receptor
GWpS				TraesCS6A02G048800	24852084	24857645	Plant glutamate receptor, periplasmic ligand-binding domain
GWpS				TraesCS6A02G048900	24921651	24922607	Gliadin/LMW glutenin
GWpS	WTa_06cf1e	6A	25019163	TraesCS6A02G049000	25017986	25022413	Plant glutamate receptor, periplasmic ligand-binding domain
GWpS				TraesCS6A02G049100	25107550	25108401	Gliadin/LMW glutenin
GWpS				TraesCS6A02G049200	25203493	25204413	Bifunctional inhibitor/plant lipid transfer protein/seed storage helical domain superfamily
GWpS				TraesCS2B02G447200	640101638	640101847	Protein of unknown function DUF3339
GWpS				TraesCS2B02G447300	640103011	640112061	Oxygen-dependent coproporphyrinogen III oxidase superfamily
GWpS	WTa_0a070e	2B	640340511	TraesCS2B02G447400	640334480	640341450	Potassium transporter
GWpS				TraesCS2B02G447800	640502916	640504349	NA
GWpS				TraesCS7A02G456400	652484081	652484821	TRAM/LAG1/CLN8 homology domain
GWpS				TraesCS7A02G456500	652490463	652491522	TLC domain-containing protein At5g14285-like
GWpS				TraesCS7A02G456600	652507499	652508173	Protein of unknown function DUF761, plant
GWpS				TraesCS7A02G456700	652515307	652518150	ClpA/B family
GWpS				TraesCS7A02G456800	652538568	652540373	Bulb-type lectin domain superfamily
GWpS				TraesCS7A02G456900	652540646	652540981	Protein kinase-like domain superfamily
GWpS				TraesCS7A02G457000	652558078	652560611	Major sperm protein (MSP) domain
GWpS	WTa_088fe3	7A	652692209	TraesCS7A02G457100	652689580	652695348	Heat shock protein 70 family
GWpS				TraesCS7A02G457200	652703802	652712442	Mechanosensitive ion channel MscS
GWpS				TraesCS7A02G457300	652718174	652722085	Exoribonuclease, PH domain 2 superfamily
GWpS				TraesCS7A02G457500	652724729	652728635	Leucine-rich repeat domain superfamily
GWpS				TraesCS7A02G457800	652756870	652761046	Protein of unknown function DUF594
GWpS				TraesCS7A02G457800	652756870	652761046	Domain of unknown function DUF4220
GWpS				TraesCS7A02G457900	652902626	652903545	Phospholipase A2
GWpS				TraesCS7A02G458100	652922228	652922731	Zinc finger, RING-type
GWpS				TraesCS5A02G517700	680497924	680501638	Remorin, C-terminal
GWpS				TraesCS5A02G517800	680502205	680502447	SWAP/Surp superfamily
GWpS				TraesCS5A02G517900	680502679	680504814	Ubiquitin-like domain
GWpS				TraesCS5A02G518000	680509172	680512102	Ubiquitin-like domain
GWpS				TraesCS5A02G518100	680531916	680532958	Protein of unknown function DUF674
GWpS	WTa_05ea93	5A	680618100	TraesCS5A02G518300	680618206	680620126	Major intrinsic protein
GWpS				TraesCS5A02G518400	680659809	680661889	Ubiquitin-like domain
GWpS				TraesCS5A02G518500	680695394	680696809	P-loop containing nucleoside triphosphate hydrolase
GWpS				TraesCS5A02G518600	680708649	680710440	UDP-glucuronosyl/UDP-glucosyltransferase
GWpS				TraesCS5A02G518700	680740658	680743928	Ubiquitin-like domain
GWpS				TraesCS5A02G518900	680749031	680750581	P-loop containing nucleoside triphosphate hydrolase
GWpS				TraesCS5A02G519100	680763191	680764307	Protein of unknown function DUF674
GWpS				TraesCS5A02G519200	680832594	680835188	CDC50/LEM3 family
GWpS				TraesCS5A02G519300	680840973	680845421	NAC domain
GWpS				TraesCS5A02G519400	680866290	680869121	Protein kinase domain
GWpS				TraesCS3B02G029800	13731936	13734151	Myc-type, basic helix-loop-helix (bHLH) domain
GWpS				TraesCS3B02G029900	13744964	13749320	O-acyltransferase, WSD1, N-terminal
GWpS	WTa_03bff0	3B	13814746	TraesCS3B02G030000	13814087	13817475	Leucine-rich repeat domain superfamily
GWpS				TraesCS3B02G030300	13903747	13905667	Cytochrome P450
GWpS				TraesCS3B02G030400	13920028	13920998	Dirigent protein
GWpS				TraesCS3B02G030600	13960570	13967611	Protein kinase domain
GWpS				TraesCS3B02G030500	13961374	13964727	Protein kinase domain
GWpS				TraesCS3B02G030700	13992978	13994298	TRAF-like
GWpS				TraesCS3B02G030800	14022297	14023737	TRAF-like
GWpS				TraesCS3B02G030900	14064574	14065888	Zinc finger, RING/FYVE/PHD-type
GWpS				TraesCS5B02G547900	700741102	700744445	Protein of unknown function DUF594
GWpS				TraesCS5B02G548100	700854870	700856601	Cytochrome P450
GWpS	WTa_068b58	5B	700918802	TraesCS5B02G548200	700917011	700918440	Zinc finger, RING/FYVE/PHD-type
GWpS				TraesCS5B02G548300	700936413	700939062	Cytochrome P450, E-class, group I
GWpS				TraesCS5B02G548400	700945256	700947048	Cytochrome P450
GWpS				TraesCS5B02G548500	700997146	700998633	Expansin
GWpS				TraesCS5B02G548600	701001929	701002519	Cytochrome P450 superfamily
GWpS				TraesCS5B02G548700	701050114	701051876	Cytochrome P450
GWpS				TraesCS5B02G548900	701149598	701155633	FCP1 homology domain
GWpS				TraesCS5B02G549000	701158488	701163796	Leucine-rich repeat domain superfamily
GWpS				TraesCS7A02G013600	6276854	6277858	Protein kinase domain
GWpS				TraesCS7A02G013700	6297519	6300866	Wall-associated receptor kinase, galacturonan-binding domain
GWpS				TraesCS7A02G013800	6302330	6305228	Yippee/Mis18/Cereblon
GWpS				TraesCS7A02G014000	6325342	6328861	Protein NPG1-like
GWpS				TraesCS7A02G014100	6330481	6333318	Ribosomal protein L9
GWpS				TraesCS7A02G014200	6334277	6338101	Transcription factor GRAS
GWpS	WTa_08111b	7A	6496026	TraesCS7A02G014600	6495347	6500530	Biotin/lipoyl attachment
GWpS				TraesCS7A02G014700	6503047	6509696	Protein arginine N-methyltransferase
GWpS				TraesCS7A02G014700	6503047	6509696	Protein arginine N-methyltransferase
GWpS				TraesCS7A02G014800	6510479	6527166	Protein kinase-like domain superfamily
GWpS				TraesCS7A02G014900	6531769	6534707	F-box-like domain superfamily
GWpS				TraesCS7A02G015000	6535850	6544814	Ancestral coatomer element 1, Sec16/Sec31
GWpS				TraesCS7A02G015100	6595334	6598800	Mitochondrial pyruvate carrier
GWpS				TraesCS7A02G015200	6650955	6658521	Protein kinase domain
GWpS				TraesCS7A02G015300	6663885	6667126	Protein kinase, ATP binding site
GWpS				TraesCS7A02G015500	6709789	6710668	Myb/SANT-like domain
GWpS				TraesCS6B02G134300	131650864	131651822	NA
GWpS	WTa_05c21a	5A	552374576	TraesCS5A02G348900	552278787	552279182	Domain of unknown function DUF4220
GWpS				TraesCS5A02G349000	552314394	552316690	Multi antimicrobial extrusion protein
GWpS				TraesCS5A02G349300	552503248	552505083	FAD/NAD(P)-binding domain superfamily
GWpS				TraesCS5A02G349500	552522546	552527632	PB1 domain
GWpS				TraesCS5A02G349100	552372187	552377259	Multi antimicrobial extrusion protein
GWpS				TraesCS5A02G349600	552529703	552531100	RNA recognition motif domain
GWpS				TraesCS5A02G348600	552157346	552162655	BURP domain
GWpS				TraesCS5A02G349800	552549880	552550248	Ribosomal protein L18
GWpS				TraesCS5A02G348800	552267096	552270333	Domain of unknown function DUF4220
GWpS	WTa_006f6e	1A	535408158	TraesCS1A02G350600	535323850	535328371	WD40 repeat
GWpS				TraesCS1A02G350400	535311667	535313964	Winged helix DNA-binding domain superfamily
GWpS				TraesCS1A02G351000	535446433	535447323	Senescence regulator S40
GWpS				TraesCS1A02G350900	535445352	535445783	Senescence regulator S40
GWpS				TraesCS1A02G350800	535434886	535436541	Leucine-rich repeat
GWpS				TraesCS1A02G351100	535484973	535487137	F-box domain
GWpS				TraesCS1A02G350500	535314301	535318863	KA1 domain/Ssp2, C-terminal
GWpS	WTa_06247b	5B	392495431	TraesCS5B02G219100	392265720	392270613	Proteasome component (PCI) domain
GWpS	WTa_07aab8	6B	631133996	TraesCS6B02G359500	631200466	631203676	LysM domain
GWpS				TraesCS6B02G359400	631193221	631194157	Small auxin-up RNA
GWpS				TraesCS6B02G359600	631245209	631246198	Small auxin-up RNA
GWpS	WTa_05c13e	5A	549349791	TraesCS5A02G345500	549192581	549192991	Small auxin-up RNA
GWpS				TraesCS5A02G346700	549339725	549340816	Protein kinase domain
GWpS				TraesCS5A02G346100	549206613	549206900	Small auxin-up RNA
GWpS				TraesCS5A02G345700	549195926	549196497	Small auxin-up RNA
GWpS				TraesCS5A02G344900	549159798	549160259	Small auxin-up RNA
GWpS				TraesCS5A02G345300	549186195	549186605	Small auxin-up RNA
GWpS				TraesCS5A02G346800	549344265	549347781	Vacuolar protein sorting-associated protein Ist1
GWpS				TraesCS5A02G347200	549573700	549579134	Domain of unknown function DUF630
GWpS				TraesCS5A02G345400	549190929	549191351	Small auxin-up RNA
GWpS				TraesCS5A02G346300	549214634	549215068	Small auxin-up RNA
GWpS				TraesCS5A02G344600	549153750	549154412	Small auxin-up RNA
GWpS				TraesCS5A02G345600	549194492	549194997	Small auxin-up RNA
GWpS				TraesCS5A02G346900	549348735	549352275	Leucine-rich repeat domain superfamily
GWpS				TraesCS5A02G346000	549204917	549205541	Small auxin-up RNA
GWpS				TraesCS5A02G346400	549216114	549216649	Small auxin-up RNA
GWpS				TraesCS5A02G345900	549202611	549203033	Small auxin-up RNA
GWpS				TraesCS5A02G345000	549162711	549163370	Small auxin-up RNA
GWpS				TraesCS5A02G345800	549199070	549199565	Small auxin-up RNA
GWpS				TraesCS5A02G344800	549158061	549161392	Small auxin-up RNA
GWpS				TraesCS5A02G345100	549163919	549164441	Small auxin-up RNA
GWpS				TraesCS5A02G346500	549217659	549220421	Twin-arginine translocation pathway, signal sequence
GWpS				TraesCS5A02G347000	549352624	549356340	Zinc finger, RING-type
GWpS	WTa_095e73	7D	397574732	TraesCS7D02G313600	397381836	397385374	Glycosyl transferase, family 31
GWpS				TraesCS7D02G313700	397553513	397581017	Vacuolar protein sorting-associated protein 13, second N-terminal domain
GWpS				TraesCS7D02G313800	397582623	397583862	Ribosomal protein P1/P2, N-terminal domain
GWpS	WTa_03bff0	3B	13814746	TraesCS3B02G029800	13731936	13734151	Myc-type, basic helix-loop-helix (bHLH) domain
GWpS				TraesCS3B02G029900	13744964	13749320	Chloramphenicol acetyltransferase-like domain superfamily
GWpS				TraesCS3B02G030000	13814087	13817475	Protein kinase domain
GWpS				TraesCS3B02G030300	13903747	13905667	Cytochrome P450
GWpS				TraesCS3B02G030400	13920028	13920998	Dirigent protein
GWpS				TraesCS3B02G030600	13960570	13967611	Protein kinase domain
GWpS				TraesCS3B02G030500	13961374	13964727	Protein kinase domain
GWpS				TraesCS3B02G030700	13992978	13994298	Zinc finger, RING/FYVE/PHD-type
GWpS				TraesCS3B02G030800	14022297	14023737	TRAF-like
GWpS				TraesCS3B02G030900	14064574	14065888	Zinc finger, RING/FYVE/PHD-type
GWpS	WTa_083631	7A	76194642	TraesCS7A02G117600	76118406	76121640	PIN domain
GWpS				TraesCS7A02G117700	76121775	76124692	Protein BRANCHLESS TRICHOME-like
GWpS				TraesCS7A02G117801	76182477	76182911	Bifunctional inhibitor/plant lipid transfer protein/seed storage helical domain
GWpS				TraesCS7A02G117800	76188166	76189185	Protein of unknown function DUF1191
GWpS				TraesCS7A02G118000	76193975	76195405	Domain unknown function DUF295
GWpS				TraesCS7A02G118100	76290778	76294226	Peptidase S8/S53 domain
GWpS				TraesCS7A02G118200	76355063	76358292	Subtilisin-like protease, fibronectin type-III domain
GWpS				TraesCS7A02G118300	76392437	76395908	Peptidase S8/S53 domain
GWpS				TraesCS7A02G118400	76398093	76400148	Subtilisin-like protease, fibronectin type-III domain
GWpS				TraesCS7A02G118500	76424815	76426844	Peptidase S8/S53 domain
GWpS	WTa_09cfc2	2A	156760337	TraesCS2A02G189900	156514600	156515079	Zinc finger, AN1-type
GWpS				TraesCS2A02G190000	156526637	156527233	NA
GWpS				TraesCS2A02G190100	156617553	156623100	Yippee/Mis18/Cereblon
GWpS				TraesCS2A02G190200	156666712	156669046	Protein kinase-like domain superfamily
GWpS				TraesCS2A02G190300	156680227	156682021	DOMON domain
GWpS				TraesCS2A02G190400	156761605	156772626	RNA-binding domain superfamily
GWpS	WTa_021113	2B	23598640	TraesCS2B02G046800	23533844	23535816	Dienelactone hydrolase
GWpS				TraesCS2B02G047000	23542051	23545116	NAD(P)-binding domain superfamily
GWpS				TraesCS2B02G047100	23548049	23551608	Nicotianamine synthase
GWpS				TraesCS2B02G047200	23554523	23557215	Agglutinin domain superfamily
GWpS				TraesCS2B02G047300	23575924	23578715	Glycoside hydrolase, family 19, catalytic
GWpS				TraesCS2B02G047400	23580386	23583637	HSP90, C-terminal domain
GWpS				TraesCS2B02G047500	23589764	23591507	NFD6/NOXY2-like
GWpS				TraesCS2B02G047600	23596456	23597365	Jacalin-like lectin domain
GWpS				TraesCS2B02G047700	23597470	23597775	Dirigent protein
GWpS				TraesCS2B02G047800	23649078	23652756	Protein kinase domain
GWpS				TraesCS2B02G047900	23715446	23717380	NAD(P)-binding domain superfamily
GWpS				TraesCS2B02G048000	23736105	23737079	D-isomer specific 2-hydroxyacid dehydrogenase, catalytic domain
GWpS				TraesCS2B02G048100	23808598	23812916	NAD(P)-binding domain superfamily
PH				TraesCS4D02G035200	15911931	15916180	Lipoxygenase
PH				TraesCS4D02G035300	15927016	15929136	LysM domain superfamily
PH				TraesCS4D02G035500	15963890	15967257	Pentatricopeptide repeat
PH				TraesCS4D02G035700	16016531	16019492	HAD hydrolase, subfamily IA
PH				TraesCS4D02G035800	16020855	16022009	Pre-mRNA-splicing factor 18
PH				TraesCS4D02G035900	16052840	16063288	HEAT repeat
PH				TraesCS4D02G036000	16098177	16105037	Ethylene-insensitive protein 2
PH				TraesCS4D02G036100	16146441	16147710	ELO family
PH	WTa_056214	4D	16156318	TraesCS4D02G036300	16154026	16154899	Protein of unknown function DUF1764, eukaryotic
PH				TraesCS4D02G036400	16231200	16235987	GAF domain
PH				TraesCS4D02G036500	16244817	16251468	Phosphatidylinositol-4-phosphate 5-kinase, core
PH				TraesCS4D02G036600	16252285	16253234	Cysteine peptidase, cysteine active site
PH				TraesCS4D02G036700	16256840	16261317	Papain-like cysteine endopeptidase
PH				TraesCS4D02G036800	16260207	16260653	Peptidase C1A, papain C-terminal
PH				TraesCS4D02G036900	16264532	16265637	Papain-like cysteine endopeptidase
PH				TraesCS4D02G037000	16301263	16302368	Cysteine peptidase, cysteine active site
PH				TraesCS4D02G037100	16305621	16306726	Papain-like cysteine endopeptidase
PH				TraesCS4D02G037200	16326502	16327607	Cysteine peptidase, cysteine active site
PH				TraesCS4D02G037300	16331015	16332120	Papain-like cysteine endopeptidase
PH				TraesCS4D02G037400	16334772	16335870	Peptidase C1A, papain C-terminal
PH				TraesCS4D02G037500	16345904	16347009	Papain-like cysteine endopeptidase
PH				TraesCS4D02G037600	16353367	16353819	Peptidase C1A, papain C-terminal
PH				TraesCS4D02G037700	16355471	16361346	Pinin
PH				TraesCS4D02G037800	16365105	16367240	UDP-glycosyltransferase family, conserved site
PH				TraesCS4D02G037900	16368244	16370110	UDP-glucuronosyl/UDP-glucosyltransferase
PH				TraesCS1A02G298800	493736793	493737676	Protein maintenance of PSII under high light 1
PH				TraesCS1A02G298900	493815619	493820587	VHS domain
PH				TraesCS1A02G299000	493821133	493823736	Pentatricopeptide repeat
PH	WTa_005e2b	1A	493919653	TraesCS1A02G299100	493919421	493923356	Pyridoxal phosphate-dependent transferase
PH				TraesCS1A02G299200	494024032	494026393	MFS transporter superfamily
PH				TraesCS2B02G245300	249416750	249418844	EamA domain
PH				TraesCS2B02G245400	249457969	249458831	Late embryogenesis abundant protein, LEA_2 subgroup
PH				TraesCS2B02G245500	249463926	249465714	Late embryogenesis abundant protein, LEA_2 subgroup
PH	WTa_024fa1	2B	249518161	TraesCS2B02G245600	249517596	249524956	Endoplasmic reticulum vesicle transporter, C-terminal
PH				TraesCS2B02G245800	249668859	249670062	VASCULAR-RELATED UNKNOWN PROTEIN
PH				TraesCS3B02G032900	15864214	15865335
PH				TraesCS3B02G033000	16035816	16037449	P-loop containing nucleoside triphosphate hydrolase
PH	WTa_03c11e	3B	16038060	TraesCS3B02G033100	16038550	16040849	Mitochondrial carrier protein
PH				TraesCS3B02G033200	16049143	16050606	Rx, N-terminal
PH				TraesCS3B02G033300	16056140	16057123	P-loop containing nucleoside triphosphate hydrolase
PH				TraesCS3B02G033400	16078276	16079730	UDP-glucuronosyl/UDP-glucosyltransferase
PH				TraesCS3B02G033700	16129137	16130949	TRAF-like
PH				TraesCS3B02G033800	16133129	16137429	Seven-in-absentia protein, TRAF-like domain
PH				TraesCS3B02G033900	16180088	16180376	Ribosomal protein S21e
PH				TraesCS3B02G034100	16212873	16215454	Heavy metal-associated domain, HMA
PH				TraesCS7A02G040600	18874137	18875189	Bromodomain associated domain
PH				TraesCS7A02G040700	18877009	18883267	Ribonuclease H superfamily
PH				TraesCS7A02G040800	18993714	18997367	Armadillo-like helical
PH				TraesCS7A02G040900	19002179	19007777	Sucrose synthase
PH				TraesCS7A02G041000	19016906	19026849	Virus X resistance protein-like, coiled-coil domain
PH	WTa_081e42	7A	19081795	TraesCS7A02G041100	19082580	19083963	C2 domain superfamily
PH				TraesCS7A02G041200	19174161	19178855	Cytochrome P450
PH				TraesCS7A02G041300	19218992	19222512	Papain-like cysteine peptidase superfamily
PH				TraesCS7A02G041400	19251537	19252302	Late embryogenesis abundant protein At5g17165-like
PH				TraesCS7A02G041500	19253728	19259576	GDSL lipase/esterase
PH				TraesCS7A02G041600	19318682	19320005	Protein of unknown function DUF1138
PH
PH				TraesCS7D02G325600	416021811	416022835	Cytochrome b561/ferric reductase transmembrane
PH	WTa_095f10	7D	416235092	TraesCS7D02G325700	416232607	416237351	5'-3' exonuclease, C-terminal domain superfamily
PH				TraesCS7D02G325800	416237332	416238720	Molybdate transporter 1/2
PH				TraesCS7D02G325900	416240957	416247993	ODR-4-like
PH				TraesCS7D02G326000	416247764	416252213	Choline transporter-like
PH				TraesCS7D02G326100	416273574	416276439	Protein kinase, ATP binding site
PH				TraesCS7D02G326200	416412324	416413797	High mobility group box domain
PH				TraesCS6B02G154000	157662097	157664909	Zinc finger C2H2-type
PH				TraesCS6B02G154200	157778352	157779809	Leucine-rich repeat
PH				TraesCS6B02G154300	157900215	157902762	Leucine-rich repeat domain superfamily
PH	WTa_076d70	6B	157911835	TraesCS6B02G154400	157911545	157912369	Leucine-rich repeat-containing N-terminal, plant-type
PH				TraesCS6B02G154600	158074629	158075990	Leucine-rich repeat
PH				TraesCS6B02G154700	158101788	158103875	Leucine-rich repeat domain superfamily
PH				TraesCS6B02G155000	158147691	158149790	Leucine-rich repeat
PH				TraesCS6B02G155300	158160911	158162125	Leucine-rich repeat
PH	WTa_0523ce	4B	140882310	TraesCS4B02G120100	140701509	140711209
PH				TraesCS1D02G065000	46392071	46397654
PH	WTa_013fe4	1D	46631889	TraesCS1D02G065300	46631910	46635411	Glycosyl transferase, family 20
PH				TraesCS1D02G065400	46644064	46644948	Domain unknown function DUF295
PH				TraesCS5A02G256600	472110658	472112472	Cationic amino acid transporter, C-terminal
PH				TraesCS5A02G256700	472274509	472278632	Low temperature viability protein Ltv1
PH				TraesCS5A02G256800	472283218	472286666	Mechanosensitive ion channel MscS
PH	WTa_05a6c1	5A	472341821	TraesCS5A02G256900	472342167	472342601	Photosystem I PsaG/PsaK protein
PH				TraesCS5A02G257000	472343769	472347729	NA
PH				TraesCS5A02G257100	472434011	472435779	UDP-glucuronosyl/UDP-glucosyltransferase
PH				TraesCS5A02G257193	472472140	472472880	Tetratricopeptide-like helical domain superfamily
PH				TraesCS5A02G257200	472479490	472481289	Senescence/spartin-associated
PH				TraesCS5A02G257400	472510197	472510535	Ribonuclease H superfamily
PH				TraesCS5A02G257600	472589923	472591058	Class I-like SAM-dependent O-methyltransferase
PH				TraesCS4B02G006900	4708107	4711615	GDSL lipase/esterase
PH				TraesCS4B02G007000	4718152	4720974	Leucine-rich repeat domain superfamily
PH				TraesCS4B02G007100	4848415	4852836	R3H domain
PH				TraesCS4B02G007200	4890004	4893309	P-type ATPase, haloacid dehalogenase domain
PH	WTa_I00b8b3	4B	4897036	TraesCS4B02G007300	4894204	4897519	Ribosomal protein L1
PH				TraesCS4B02G007400	4951076	4955090	Leucine-rich repeat domain superfamily
PH				TraesCS4B02G007500	4990514	4994422	NB-ARC
PH				TraesCS4B02G007600	5013781	5016961	Leucine-rich repeat domain superfamily
PedL				TraesCS4D02G035200	15911931	15916180	Lipoxygenase
PedL				TraesCS4D02G035300	15927016	15929136	LysM domain superfamily
PedL				TraesCS4D02G035500	15963890	15967257	Pentatricopeptide repeat
PedL				TraesCS4D02G035700	16016531	16019492	HAD hydrolase, subfamily IA
PedL				TraesCS4D02G035800	16020855	16022009	Pre-mRNA-splicing factor 18
PedL				TraesCS4D02G035900	16052840	16063288	HEAT repeat
PedL				TraesCS4D02G036000	16098177	16105037	Ethylene-insensitive protein 2
PedL				TraesCS4D02G036100	16146441	16147710	ELO family
PedL	WTa_056214	4D	16156318	TraesCS4D02G036300	16154026	16154899	Protein of unknown function DUF1764, eukaryotic
PedL				TraesCS4D02G036400	16231200	16235987	Histidine kinase/HSP90-like ATPase superfamily
PedL				TraesCS4D02G036500	16244817	16251468	Phosphatidylinositol-4-phosphate 5-kinase, core
PedL				TraesCS4D02G036600	16252285	16253234	Cysteine peptidase, cysteine active site
PedL				TraesCS4D02G036700	16256840	16261317	Papain-like cysteine endopeptidase
PedL				TraesCS4D02G036800	16260207	16260653	Peptidase C1A, papain C-terminal
PedL				TraesCS4D02G036900	16264532	16265637	Papain-like cysteine endopeptidase
PedL				TraesCS4D02G037000	16301263	16302368	Cysteine peptidase, cysteine active site
PedL				TraesCS4D02G037000	16301263	16302368	Peptidase C1A, papain C-terminal
PedL				TraesCS4D02G037100	16305621	16306726	Papain-like cysteine endopeptidase
PedL				TraesCS4D02G037200	16326502	16327607	Cysteine peptidase, cysteine active site
PedL				TraesCS4D02G037300	16331015	16332120	Papain-like cysteine endopeptidase
PedL				TraesCS4D02G037400	16334772	16335870	Peptidase C1A, papain C-terminal
PedL				TraesCS4D02G037500	16345904	16347009	Papain-like cysteine endopeptidase
PedL				TraesCS4D02G037600	16353367	16353819	Peptidase C1A, papain C-terminal
PedL				TraesCS4D02G037700	16355471	16361346	Pinin
PedL				TraesCS4D02G037800	16365105	16367240	UDP-glucuronosyl/UDP-glucosyltransferase
PedL				TraesCS4D02G037900	16368244	16370110	UDP-glycosyltransferase family, conserved site
PedL				TraesCS7B02G492100	744390501	744405340	ARID DNA-binding domain
PedL				TraesCS7B02G492200	744443931	744446289	SKP1-like, dimerisation domain superfamily
PedL				TraesCS7B02G492300	744460641	744463019	S-phase kinase-associated protein 1-like
PedL				TraesCS7B02G492400	744493525	744495829	SKP1-like, dimerisation domain superfamily
PedL				TraesCS7B02G492500	744504787	744507436	S-phase kinase-associated protein 1-like
PedL	WTa_093c63	7B	744604206	TraesCS7B02G492600	744560575	744562737	Chloramphenicol acetyltransferase-like domain superfamily
PedL				TraesCS7B02G492900	744648123	744652682	Rx, N-terminal
PedL				TraesCS7B02G493000	744648279	744652173	Leucine-rich repeat domain superfamily
PedL				TraesCS7B02G493100	744660863	744663762	Mediator complex subunit 15, KIX domain
PedL				TraesCS7B02G493200	744723399	744729639	Glycosyl transferase, family 8
PedL				TraesCS3A02G024800	13334351	13335741	Transferase
PedL				TraesCS3A02G025000	13363700	13364748	Transferase
PedL				TraesCS3A02G025100	13375607	13376509	TFA2, Winged helix domain 2
PedL				TraesCS3A02G025200	13404835	13407376	TRAF-like
PedL				TraesCS3A02G025300	13409567	13411244	SGNH hydrolase superfamily
PedL				TraesCS3A02G025400	13412673	13414123	GDSL lipase/esterase
PedL	WTa_0334ba	3A	13497271	TraesCS3A02G025500	13496471	13504464	Eukaryotic translation initiation factor 3 subunit A
PedL				TraesCS3A02G025600	13509499	13510375	Protein of unknown function DUF4228, plant
PedL				TraesCS3A02G025700	13514343	13517898	Methyltransferase domain
PedL				TraesCS3A02G025800	13517881	13521368	E3 ubiquitin-protein ligase MARCH-like
PedL				TraesCS3A02G025900	13535077	13537345	Cytochrome P450
PedL				TraesCS3A02G026000	13554617	13560113	Transmembrane protein DDB_G0292058-like
PedL				TraesCS1D02G065000	46392071	46397654	NA
PedL	WTa_013fe4	1D	46631889	TraesCS1D02G065300	46631910	46635411	Glycosyl transferase, family 20
PedL				TraesCS1D02G065400	46644064	46644948	Domain unknown function DUF295
PedL				TraesCS7D02G457200	575679950	575686042	RNA recognition motif domain
PedL				TraesCS7D02G457300	575690331	575692422	Myb domain
PedL				TraesCS7D02G457400	575741272	575743835	SANT/Myb domain
PedL				TraesCS7D02G457500	575772430	575774607	Myb domain
PedL				TraesCS7D02G457600	575818582	575821271	SANT/Myb domain
PedL				TraesCS7D02G457700	575861395	575865150	Protein JASON
PedL				TraesCS7D02G457800	575865501	575871583	Aminotransferase class V domain
PedL	WTa_09646e	7D	575925006	TraesCS7D02G457900	575924889	575929332	Leucine-rich repeat domain superfamily
PedL				TraesCS7D02G458000	575945655	575955076	SANT/Myb domain
PedL				TraesCS7D02G458100	576055977	576056549	Cullin repeat-like-containing domain superfamily
PedL				TraesCS7D02G458200	576173719	576177698	OTU domain
PedL				TraesCS1A02G012200	7100687	7101431	Adaptor protein Cbl, N-terminal domain superfamily
PedL				TraesCS1A02G012400	7109888	7115465	F-box domain
PedL				TraesCS1A02G012500	7178200	7184960	Citron homology (CNH) domain
PedL				TraesCS1A02G012600	7185497	7186507	Leucine-rich repeat domain superfamily
PedL				TraesCS1A02G012700	7228719	7229943	Enoyl-CoA hydratase/isomerase
PedL				TraesCS1A02G012800	7274801	7275803	ClpP/crotonase-like domain superfamily
PedL				TraesCS1A02G012900	7276861	7279534	Enoyl-CoA hydratase/isomerase
PedL				TraesCS1A02G012900	7276861	7279534	ClpP/crotonase-like domain superfamily
PedL	WTa_00080b	1A	7289633	TraesCS1A02G013000	7281836	7294634	NB-ARC
PedL				TraesCS1A02G013100	7311700	7312269	Transcription factor, MADS-box superfamily
PedL				TraesCS1A02G013200	7315101	7325769	Ankyrin repeat
PedL				TraesCS6A02G242700	454545950	454548173	Alpha/Beta hydrolase fold
PedL				TraesCS6A02G242800	454646497	454650205	Protein kinase-like domain superfamily
PedL	WTa_06fde6	6A	454651109	TraesCS6A02G242900	454648252	454657880	Transcription initiation factor TFIID component TAF4
PedL				TraesCS6A02G243000	454675273	454679707	Peptidase C12, ubiquitin carboxyl-terminal hydrolase
PedL				TraesCS6A02G243100	454679710	454681656	Domain of unknown function DUF632
PedL				TraesCS6A02G243200	454706798	454708469	ABC-2 type transporter
PedL				TraesCS6A02G243300	454710994	454712683	AP2/ERF domain
PedL				TraesCS6A02G243400	454804396	454810913	Uncharacterised protein family UPF0565
PedL				TraesCS1A02G285200	482758866	482761946	Ubiquitin-conjugating enzyme E2
PedL				TraesCS1A02G285300	482767994	482768440	Histone H2B
PedL				TraesCS1A02G285400	482767938	482771537	DHBP synthase RibB-like alpha/beta domain superfamily
PedL				TraesCS1A02G285500	482777474	482780309	Ribosomal protein L17
PedL				TraesCS1A02G285600	482780626	482783275	Protein-tyrosine phosphatase-like, PTPLA
PedL				TraesCS1A02G285700	482794568	482815155	Cytochrome b245, heavy chain
PedL				TraesCS1A02G285900	482963667	482964392	Zinc finger C2H2 superfamily
PedL	WTa_005bb5	1A	482966563	TraesCS1A02G286000	482966428	482969358	Longin-like domain superfamily
PedL				TraesCS1A02G286100	483025155	483025697	Zinc finger C2H2 superfamily
PedL				TraesCS1A02G286200	483026579	483029884	Small GTPase
PedL				TraesCS1A02G286300	483033163	483035128	Ribosomal protein S8
PedL				TraesCS1A02G286400	483133188	483134809	Chloramphenicol acetyltransferase-like domain superfamily
PedL				TraesCS1A02G286500	483195165	483197070	Transferase
PedL				TraesCS2B02G552500	748490009	748491446	Protein kinase domain
PedL				TraesCS2B02G552900	748703368	748704327	F-box domain
PedL				TraesCS2B02G553000	748708519	748711640	Programmed cell death protein 2, C-terminal
PedL	WTa_02af0e	2B	748720274	TraesCS2B02G553100	748720691	748727382	Glycoside hydrolase, family 3, N-terminal
PedL				TraesCS2B02G553200	748946441	748947369	F-box associated domain, type 3
DH				TraesCS6A02G348200	580298978	580302286	Clp, repeat (R) domain
DH				TraesCS6A02G348300	580316422	580320166	Amino acid transporter, transmembrane domain
DH	WTa_071380	6A	580538115	TraesCS6A02G348400	580533267	580537934	Amino acid transporter, transmembrane domain
DH				TraesCS6A02G000500	571479	575107	Protein kinase domain
DH				TraesCS6A02G000600	610042	615530	Thioredoxin-like superfamily
DH				TraesCS6A02G000700	616773	620979	Heat shock chaperonin-binding
DH				TraesCS6A02G000800	629428	634290	Enhancer of polycomb protein
DH				TraesCS6A02G000900	634738	636233	Ferredoxin thioredoxin reductase catalytic beta subunit
DH				TraesCS6A02G001000	637025	639371	Zinc finger, RING/FYVE/PHD-type
DH	WTa_06b29d	6A	683572	TraesCS6A02G001100	637766	644465	Disulphide isomerase
DH				TraesCS6A02G001300	766648	769202	Leucine-rich repeat domain superfamily
DH				TraesCS6A02G001400	771942	774641	Neprosin activation peptide
DH				TraesCS6A02G001500	786731	788315	Oxoglutarate/iron-dependent dioxygenase
DH				TraesCS6A02G001700	811604	816032	Protein kinase domain
DH				TraesCS6A02G001800	818204	825117	Leucine-rich repeat domain superfamily
DH				TraesCS6A02G001900	860722	867161	Protein kinase domain
DH				TraesCS6A02G002000	914925	915899	Protein OCTOPUS-like
DH				TraesCS2B02G410500	584105563	584106775	Ovate protein family
DH	WTa_0272a4	2B	584112356	TraesCS2B02G410600	584112420	584121251	ELMO domain
DH				TraesCS5B02G566700	710784625	710786786	FAD/NAD(P)-binding domain superfamily
DH	WTa_068ed8	5B	710959514	TraesCS5B02G566900	710959787	710965476	NB-ARC
DH				TraesCS5B02G567000	711131670	711136822	Leucine-rich repeat domain superfamily
DH				TraesCS5B02G567100	711148062	711152452	Leucine-rich repeat
DH				TraesCS5B02G567200	711152492	711155088	NB-ARC
DH				TraesCS5B02G567300	711180462	711188086	Rx, N-terminal
DH				TraesCS1A02G356600	539720660	539724029	Protein kinase domain
DH				TraesCS1A02G356700	539748952	539750556	Tetratricopeptide-like helical domain superfamily
DH				TraesCS1A02G356800	539754423	539758138	Glycoside hydrolase superfamily
DH				TraesCS1A02G356900	539759853	539763795	Protein kinase-like domain superfamily
DH				TraesCS1A02G357100	539872088	539883999	Cytochrome b245, heavy chain
DH				TraesCS1A02G357200	539899281	539901954	NAD(P)-binding domain superfamily
DH	WTa_007131	1A	539964181	TraesCS1A02G357300	539964292	539969025	Endonuclease/exonuclease/phosphatase superfamily
DH				TraesCS1A02G357400	539973877	539978007	S1 domain
DH				TraesCS1A02G357500	540047477	540052240	Domain of unknown function DUF4005
DH				TraesCS1A02G357600	540062518	540064393	SANT/Myb domain
DH				TraesCS1A02G357700	540124030	540124804	Bifunctional inhibitor/plant lipid transfer protein/seed storage helical domain superfamily
DH				TraesCS1A02G357800	540134248	540135929	AP2/ERF domain
DH				TraesCS1A02G357900	540143413	540150615	Aldehyde dehydrogenase domain
DH				TraesCS1A02G358000	540152157	540154702	Small GTPase
DH				TraesCS1A02G358100	540191129	540192273	WRKY domain
DH				TraesCS1A02G358200	540195023	540196890	WD40 repeat
DH				TraesCS1A02G358300	540201483	540202445	Protein kinase-like domain superfamily
DH				TraesCS7D02G003300	1986645	1992835	XS domain
DH				TraesCS7D02G003400	1998582	1999994	Transferase
DH				TraesCS7D02G003500	2036060	2038960	B-box-type zinc finger
DH				TraesCS7D02G003600	2047752	2049425	UDP-glucuronosyl/UDP-glucosyltransferase
DH				TraesCS7D02G003700	2052222	2053394	Sulfotransferase domain
DH				TraesCS7D02G003800	2087628	2098687	Armadillo-type fold
DH				TraesCS7D02G003900	2142514	2143936	Transferase
DH	WTa_094659	7D	2238665	TraesCS7D02G004000	2235620	2241146	Squalene cyclase, N-terminal
DH				TraesCS7D02G004100	2242085	2245380	Homogentisate 1,2-dioxygenase
DH				TraesCS7D02G004200	2248702	2249668	SGNH hydrolase superfamily
DH				TraesCS7D02G004300	2250254	2254442	Nucleic acid-binding, OB-fold
DH				TraesCS7D02G004400	2325194	2330620	Acyl-CoA oxidase, C-terminal
DH				TraesCS7D02G004500	2343513	2353612	Glycine-tRNA ligase, beta subunit
DH				TraesCS7D02G004600	2353898	2359909	NB-ARC
DH				TraesCS7D02G004700	2408139	2411770	NB-ARC
DH				TraesCS7D02G004800	2427251	2431409	Rx, N-terminal
DH				TraesCS7D02G004900	2440200	2443573	Protein kinase domain
DH	WTa_01d74a	2A	729063149	TraesCS2A02G499400	729159133	729166445	Translation release factor pelota
DH				TraesCS2A02G499500	729166608	729169677	UbiE/COQ5 methyltransferase
DH				TraesCS2A02G499600	729169946	729174513	Protein of unknown function DUF1365
DH				TraesCS2A02G499700	729174777	729177143	F-box domain
DH				TraesCS2A02G499800	729188813	729190448	Amino acid transporter, transmembrane domain
DH				TraesCS2A02G499900	729193603	729201357	CRAL-TRIO lipid binding domain
DH				TraesCS2A02G500000	729206717	729208124	BTB/POZ domain
DH				TraesCS2A02G500100	729228144	729228461	Ribonuclease H-like superfamily
DH				TraesCS2A02G500200	729283043	729287271	PPM-type phosphatase, divalent cation binding
DH				TraesCS2A02G500300	729289611	729292564	JmjC domain
DH				TraesCS2A02G500400	729293649	729297303	Glutamine synthetase, catalytic domain
DH	WTa_098648	1A	562708281	TraesCS1A02G396600	562739271	562742144	Zinc finger, MIZ-type
DH				TraesCS1A02G396700	562784431	562785955	FAS1 domain
DH				TraesCS1A02G396800	562805948	562806817	FAS1 domain superfamily
DH				TraesCS1A02G396900	562902344	562903176	Thioredoxin-like superfamily
DH				TraesCS1A02G397100	562912852	562915996	Lysine methyltransferase
DH				TraesCS1A02G397200	562923034	562923531	Glutaredoxin
DH				TraesCS5B02G525000	685069334	685072618	F-box domain
DH				TraesCS5B02G525100	685244607	685248639	F-box domain
DH	WTa_067ce9	5B	685322124	TraesCS5B02G525400	685321449	685323117	F-box-like domain superfamily
DH				TraesCS5B02G525500	685428909	685431848	MICOS complex subunit Mic10
DH				TraesCS5B02G525600	685432647	685437147	C2 domain
DH				TraesCS5B02G525700	685499376	685502322	F-box domain
DH				TraesCS5B02G525800	685503768	685505185	F-box-like domain superfamily
DH				TraesCS5B02G525900	685528258	685529007	UDP-glucuronosyl/UDP-glucosyltransferase
DH				TraesCS5B02G526000	685565831	685569284	Protein kinase domain
DH				TraesCS7A02G181400	136165846	136169611	Calcineurin-like phosphoesterase domain, ApaH type
DH				TraesCS7A02G181500	136171403	136173745	Endonuclease/exonuclease/phosphatase superfamily
DH				TraesCS7A02G181600	136283084	136284148	Wax synthase
DH				TraesCS7A02G181800	136342891	136343908	SNARE
DH				TraesCS7A02G181900	136346091	136347010	Acyl carrier protein (ACP)
DH	WTa_084aa8	7A	136350710	TraesCS7A02G182000	136347997	136351420	Phosphoglycerate/bisphosphoglycerate mutase, active site
